# Supplementary material
Source: PubMed Central journal article supplement (PMC9069800)
Supplement: NIHMS1795940-supplement-Main_supplement.pdf [file NIHMS1795940-supplement-Main_supplement.pdf]

Figure S1

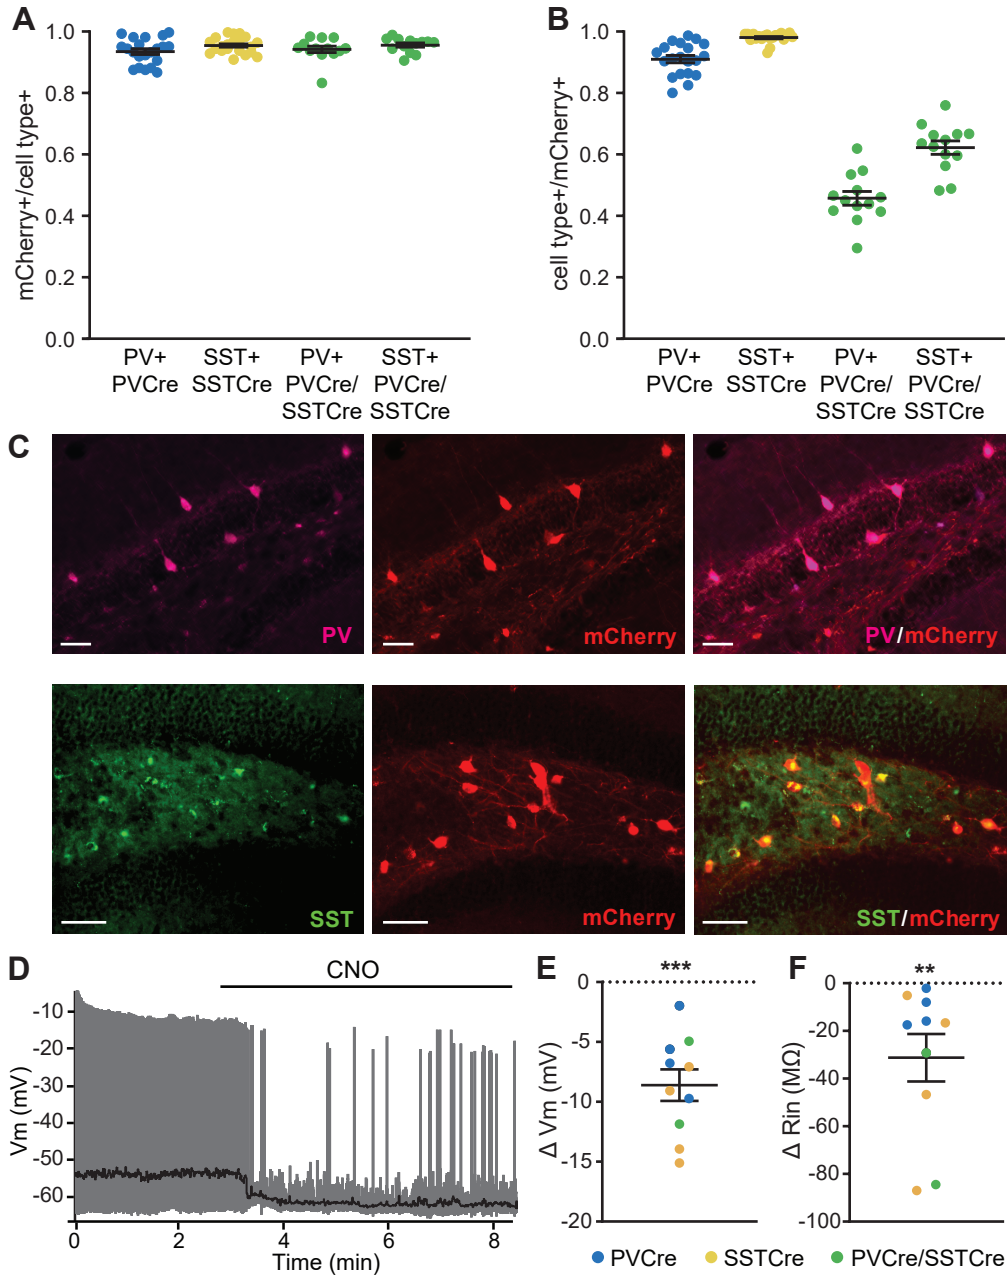

**Figure S1. DREADDs function and expression in PV<sup>+</sup> and SST<sup>+</sup> interneurons in DG and CA3. Related to Figure 1.**

(A, B) Proportion of (A) mCherry<sup>+</sup> cells in PV<sup>+</sup> and SST<sup>+</sup> cells and (B) PV<sup>+</sup> and SST<sup>+</sup> cells in mCherry<sup>+</sup> cells. N = 16 PV-Cre mice, n = 16 SST-Cre mice, and n = 13 PV-Cre/SST-Cre mice.

(C) Example of mCherry coexpression with PV (top) and SST (bottom) in DG. Scale bars are 50  $\mu\text{m}$ .

(D) CNO application to *ex vivo* hippocampal sections from a PV-Cre animal reduces the firing rate and resting membrane potential (black trace) of a PV<sup>+</sup> interneuron expressing hM4D.

(E,F) CNO application to *ex vivo* hippocampal section with PV<sup>+</sup> and SST<sup>+</sup> interneurons expressing hM4D (E) hyperpolarizes cells (1-sample t test,  $t(9)=6.57$ ,  $p = 0.0001$ ) and (F) increases input resistance (1-sample Wilcoxon test,  $W = -55$ ,  $p = 0.002$ ). N = 4 PV-Cre slices, n = 4 SST-Cre slices, and n = 2 PV-Cre/SST-Cre slices.

Error bars are mean  $\pm$  SEM. \*\*\* $p < 0.001$ . See also Table S1.

Figure S2

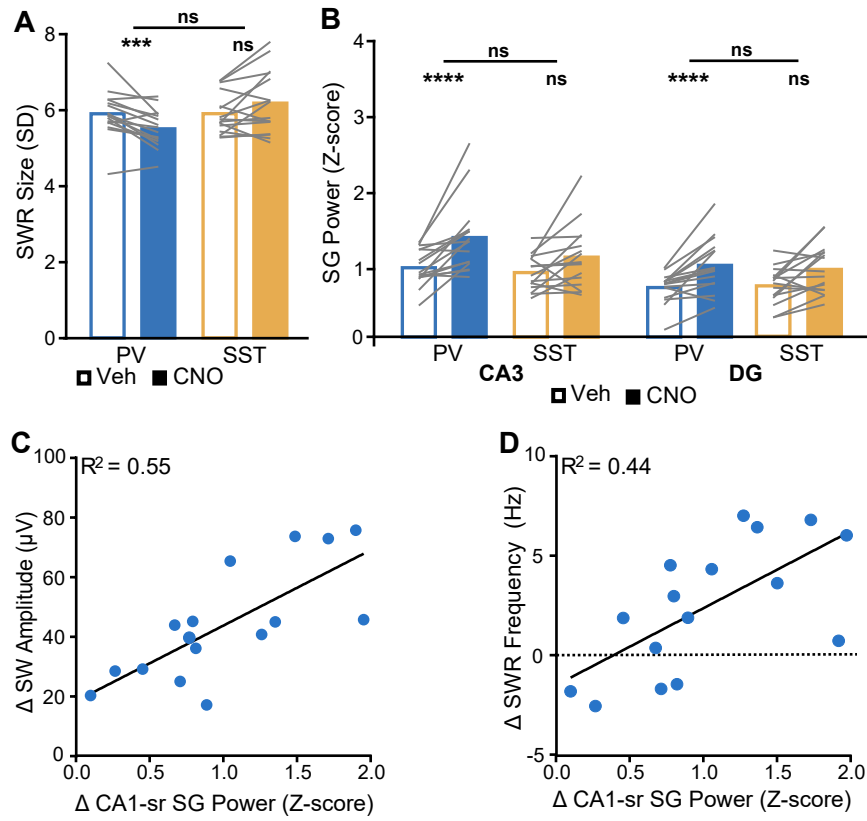

**Figure S2. Additional properties of SWRs during interneuron suppression. Related to Figures 3 and 4.**

(A) SWR size (PV:  $p = 0.00048$ ; SST:  $p = 0.07$ ; PV vs SST:  $p = 0.011$ ).

(B) Normalized SG power during SWRs in CA3 (PV:  $p = 2 \times 10^{-5}$ ; SST:  $p = 0.068$ ; PV vs SST:  $p = 0.96$ ) and DG (PV:  $p = 2.2 \times 10^{-5}$ ; SST:  $p = 0.0058$ ; PV vs SST:  $p = 0.95$ ).

(C,D) Change SWR-coincident SG power in CA1 in PV-Cre animals upon CNO treatment predicts

(C) change in SW amplitude ( $F(1,14) = 17.29$ ,  $p = 0.001$ ) and (D) change in SWR frequency

( $F(1,14) = 10.97$ ,  $p = 0.0051$ ). Pearson correlation.

$N = 16$  PV-Cre and  $n = 16$  SST-Cre mice. Statistical details in Table S3. F test of the LMM for treatment effects, likelihood ratio test for genotype-treatment interaction effects. \*\* $p < 0.01$ ; \*\*\* $p < 0.001$ ; \*\*\*\* $p < 0.0001$ . See also Tables S2–S7.

Figure S3

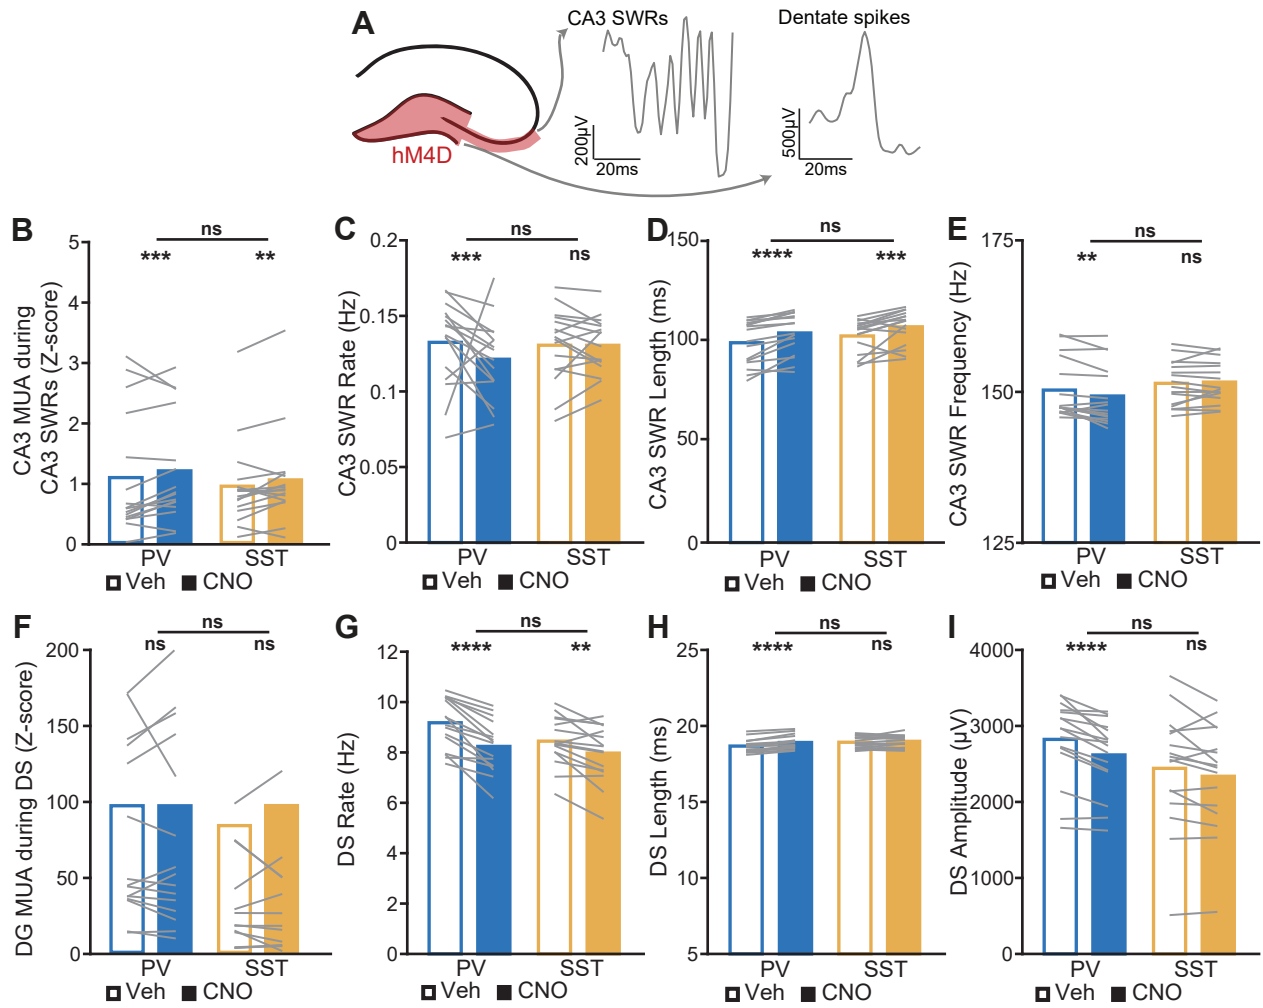

**Figure S3. Suppressing PV<sup>+</sup> or SST<sup>+</sup> interneurons modulate local CA3 SWRs and DG spikes.**

**Related to Figure 3.**

(A) Interneurons in DG and CA3 (magenta) were inhibited while SWRs in CA3-pyr and dentate spikes in DG granule cell layer (gc) were assessed. Representative raw traces of a SWR from a CA3-pyr site and a dentate spike from a DG-gc site of a PV-Cre mouse during vehicle treatment.

(B) Normalized recruitment of CA3 MUA to CA3 SWRs (PV:  $p = 0.00044$ ; SST:  $p = 0.0062$ ; PV vs SST:  $p = 1$ ).

(C) CA3 SWR rate (PV:  $p = 0.00072$ ; SST:  $p = 0.77$ ; PV vs SST:  $p = 0.28$ ).

(D) CA3 SWR temporal length (PV:  $p = 7.14 \times 10^{-6}$ ; SST:  $p = 0.0055$ ; PV vs SST:  $p = 0.86$ ).

(E) CA3 SWR instantaneous frequency (PV:  $p = 0.00057$ ; SST:  $p = 0.88$ ; PV vs SST:  $p = 0.42$ ).

(F) DG MUA during dentate spikes (PV:  $p = 0.47$ ; SST:  $p = 0.26$ ; PV vs SST:  $p = 0.15$ ).

(G) Dentate spike rate (PV:  $p = 3 \times 10^{-19}$ ; SST:  $p = 0.0027$ ; PV vs SST:  $p = 0.27$ ).

(H) Dentate spike temporal length (PV:  $p = 2.6 \times 10^{-11}$ ; SST:  $p = 0.26$ ; PV vs SST:  $p = 0.23$ ).

(I) Dentate spike amplitude (PV:  $p = 1.6 \times 10^{-7}$ ; SST:  $p = 0.044$ ; PV vs SST:  $p = 0.61$ ).

$N = 16$  PV-Cre and  $n = 16$  SST-Cre mice. Statistical details in Table S3. F test of the LMM for treatment effects, likelihood ratio test for genotype-treatment interaction effects. \*\* $p < 0.01$ ; \*\*\* $p < 0.001$ ; \*\*\*\* $p < 0.0001$ . See also Tables S2–S7.

Figure S4

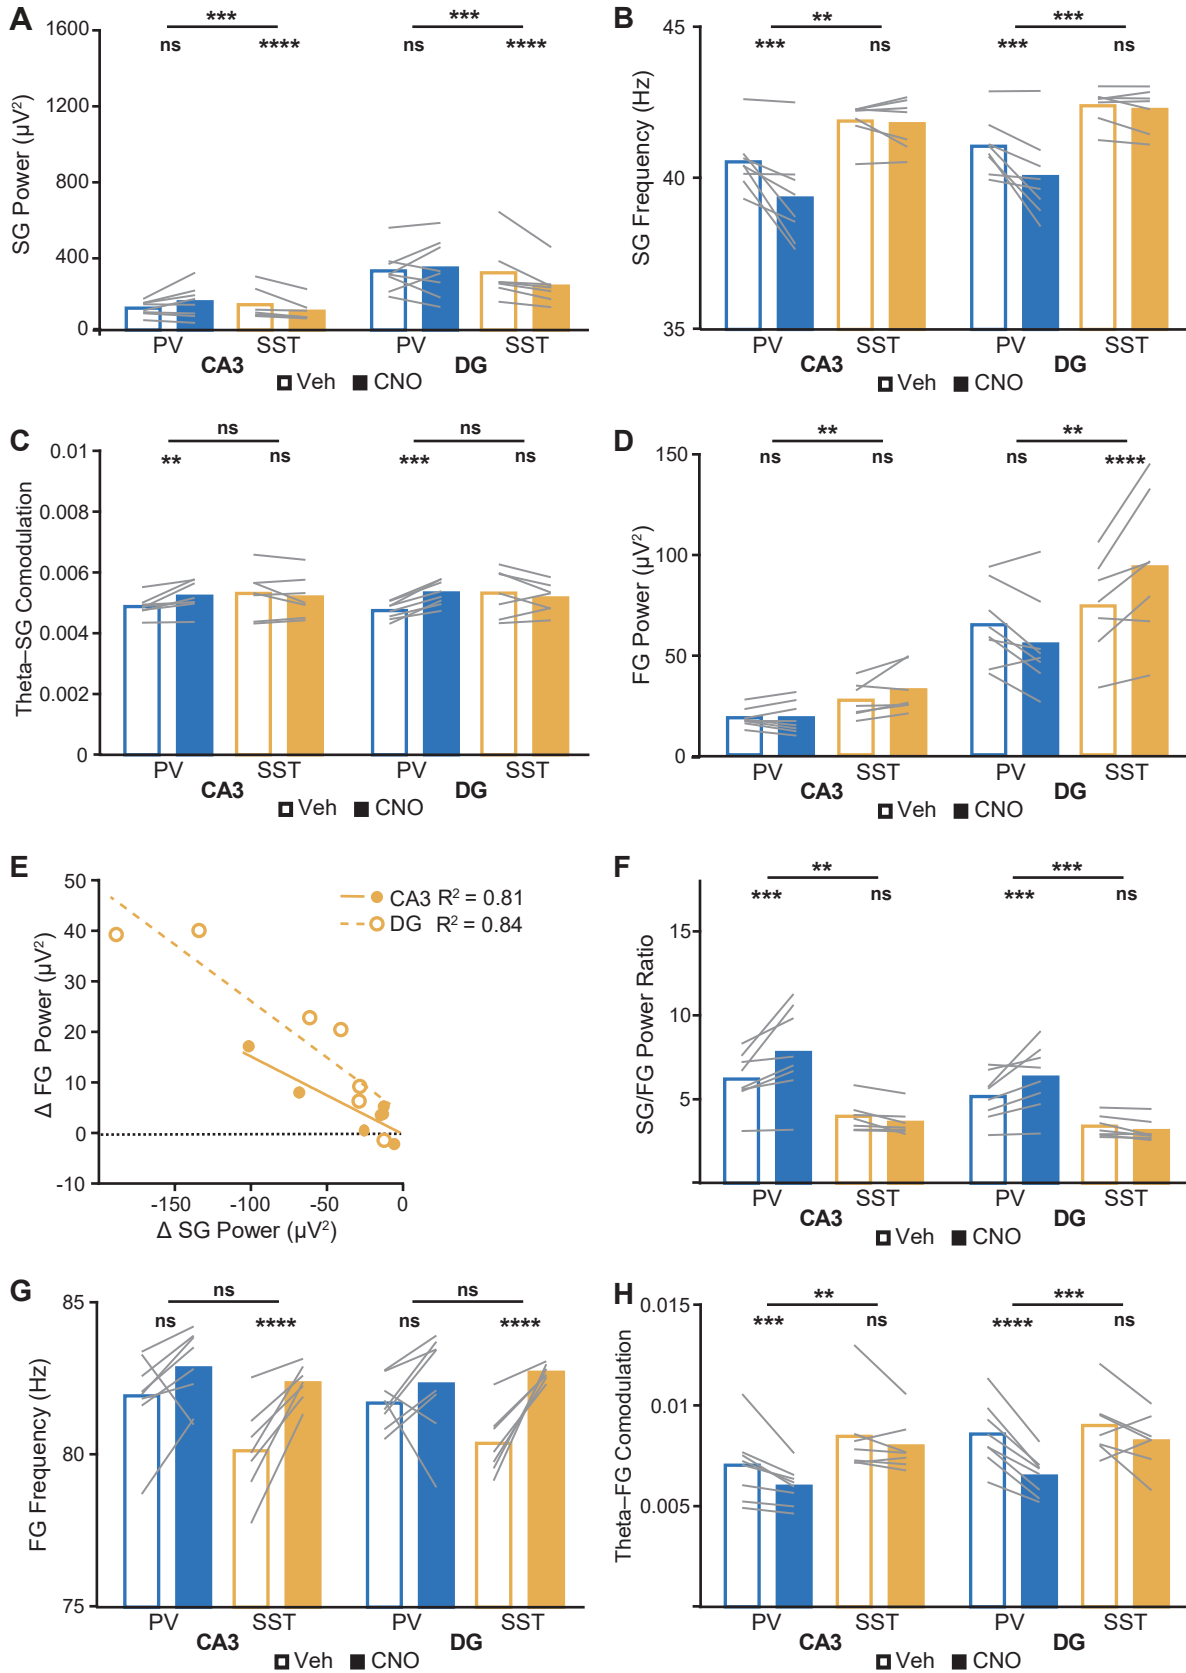

**Figure S4. Properties of SG and FG in DG and CA3 during interneuron suppression. Related to Figures 5 and 6.**

(A) SG power in CA3 (PV:  $p = 0.15$ ; SST:  $p = 5.2 \times 10^{-5}$ ; PV vs SST:  $p = 0.00088$ ) and DG (PV:  $p = 0.5$ ; SST:  $p = 1.3 \times 10^{-7}$ ; PV vs SST:  $p = 0.00042$ ).

(B) SG instantaneous frequency in CA3 (PV:  $p = 0.00023$ ; SST:  $p = 0.8$ ; PV vs SST:  $p = 0.0025$ ) and DG (PV:  $p = 0.0005$ ; SST:  $p = 0.37$ ; PV vs SST:  $p = 0.00015$ ).

(C) Theta modulation of SG power in CA3 (PV:  $p = 0.0011$ ; SST:  $p = 0.16$ ; PV vs SST:  $p = 0.0049$ ) and DG (PV:  $p = 0.0003$ ; SST:  $p = 0.22$ ; PV vs SST:  $p = 0.0054$ ).

(D) FG power in CA3 (PV:  $p = 0.42$ ; SST:  $p = 0.0076$ ; PV vs SST:  $p = 0.0027$ ) and DG (PV:  $p = 0.81$ ; SST:  $p = 1.9 \times 10^{-5}$ ; PV vs SST:  $p = 0.0025$ ).

(E) Change in SG power in SST-Cre animals upon CNO treatment predicts change in FG power in CA3 ( $F(1,5) = 20.7$ ,  $p = 0.0061$ ) and DG ( $F(1,5) = 26$ ,  $p = 0.0038$ ). Pearson correlation.

(F) Ratio of SG power to FG power in CA3 (PV:  $p = 0.00036$ ; SST:  $p = 0.0071$ ; PV vs SST:  $p = 0.002$ ) and DG (PV:  $p = 0.00031$ ; SST:  $p = 0.002$ ; PV vs SST:  $p = 0.00064$ ).

(G) FG instantaneous frequency in CA3 (PV:  $p = 0.02$ ; SST:  $p = 2.6 \times 10^{-9}$ ; PV vs SST:  $p = 0.12$ ) and DG (PV:  $p = 0.23$ ; SST:  $p = 4.1 \times 10^{-11}$ ; PV vs SST:  $p = 0.062$ ).

(H) Theta modulation of FG power in CA3 (PV:  $p = 0.00041$ ; SST:  $p = 0.19$ ; PV vs SST:  $p = 0.0026$ ) and DG (PV:  $p = 7.5 \times 10^{-11}$ ; SST:  $p = 0.11$ ; PV vs SST:  $p = 0.00053$ ).

$N = 8$  PV-Cre and  $n = 7$  SST-Cre mice. Statistical details in Table S3. F test of the LMM for treatment effects, likelihood ratio test for genotype-treatment interaction effects. \*\* $p < 0.01$ ; \*\*\* $p < 0.001$ ; \*\*\*\* $p < 0.0001$ . Central values are means and individual points are mean per animal. See also Tables S3–S7.



Figure S5

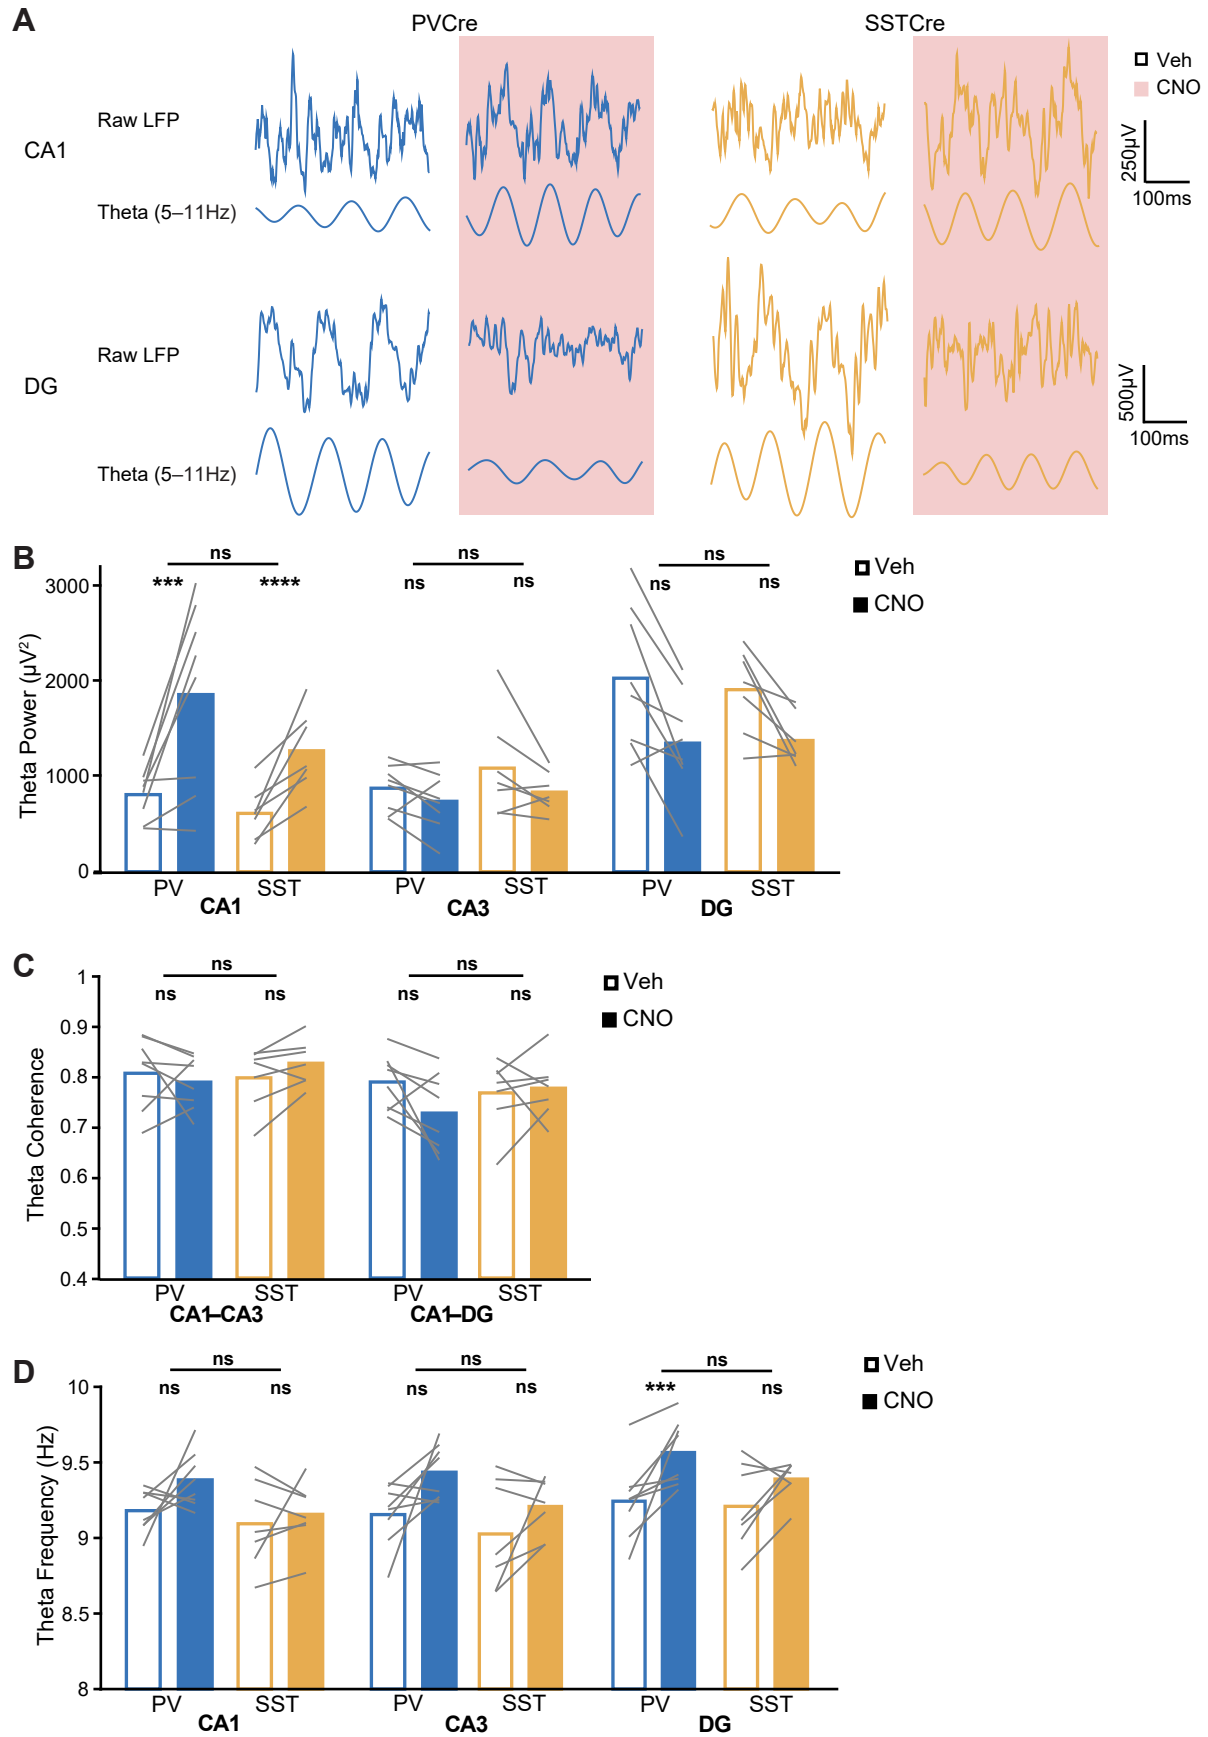

**Figure S5. Suppressing PV<sup>+</sup> or SST<sup>+</sup> interneurons unidirectionally modulates theta during movement. Related to Figures 5 and 6.**

(A) Example raw and theta-filtered LFP traces from CA1 pyramidal layer (top) and DG granule cell layer (bottom) sites from a PV-Cre (left) and an SST-Cre (right) mouse.

(B) Theta power in CA1 (PV:  $p = 0.00032$ ; SST:  $p = 4.2 \times 10^{-5}$ ; PV vs SST:  $p = 0.52$ ), CA3 (PV:  $p = 0.81$ ; SST:  $p = 0.13$ ; PV vs SST:  $p = 0.3$ ), and DG (PV:  $p = 0.12$ ; SST:  $p = 0.0097$ ; PV vs SST:  $p = 0.85$ ).

(C) Theta frequency band coherence between CA1 and CA3 (PV:  $p = 0.57$ ; SST:  $p = 0.047$ ; PV vs SST:  $p = 0.62$ ) and between CA1 and DG (PV:  $p = 0.024$ ; SST:  $p = 0.76$ ; PV vs SST:  $p = 0.89$ ).

(D) Theta instantaneous frequency in CA1 (PV:  $p = 0.0082$ ; SST:  $p = 0.29$ ; PV vs SST:  $p = 0.06$ ), CA3 (PV:  $p = 0.0077$ ; SST:  $p = 0.1$ ; PV vs SST:  $p = 0.3$ ), and DG (PV:  $p = 0.00061$ ; SST:  $p = 0.1$ ; PV vs SST:  $p = 0.67$ ).

$N = 8$  PV-Cre and  $n = 7$  SST-Cre mice. Statistical details in Table S3. F test of the LMM for treatment effects, likelihood ratio test for genotype-treatment interaction effects. \*\* $p < 0.01$ ; \*\*\* $p < 0.001$ ; \*\*\*\* $p < 0.0001$ . Central values are means and individual points are mean per animal. See also Tables S3–S7.

Figure S6

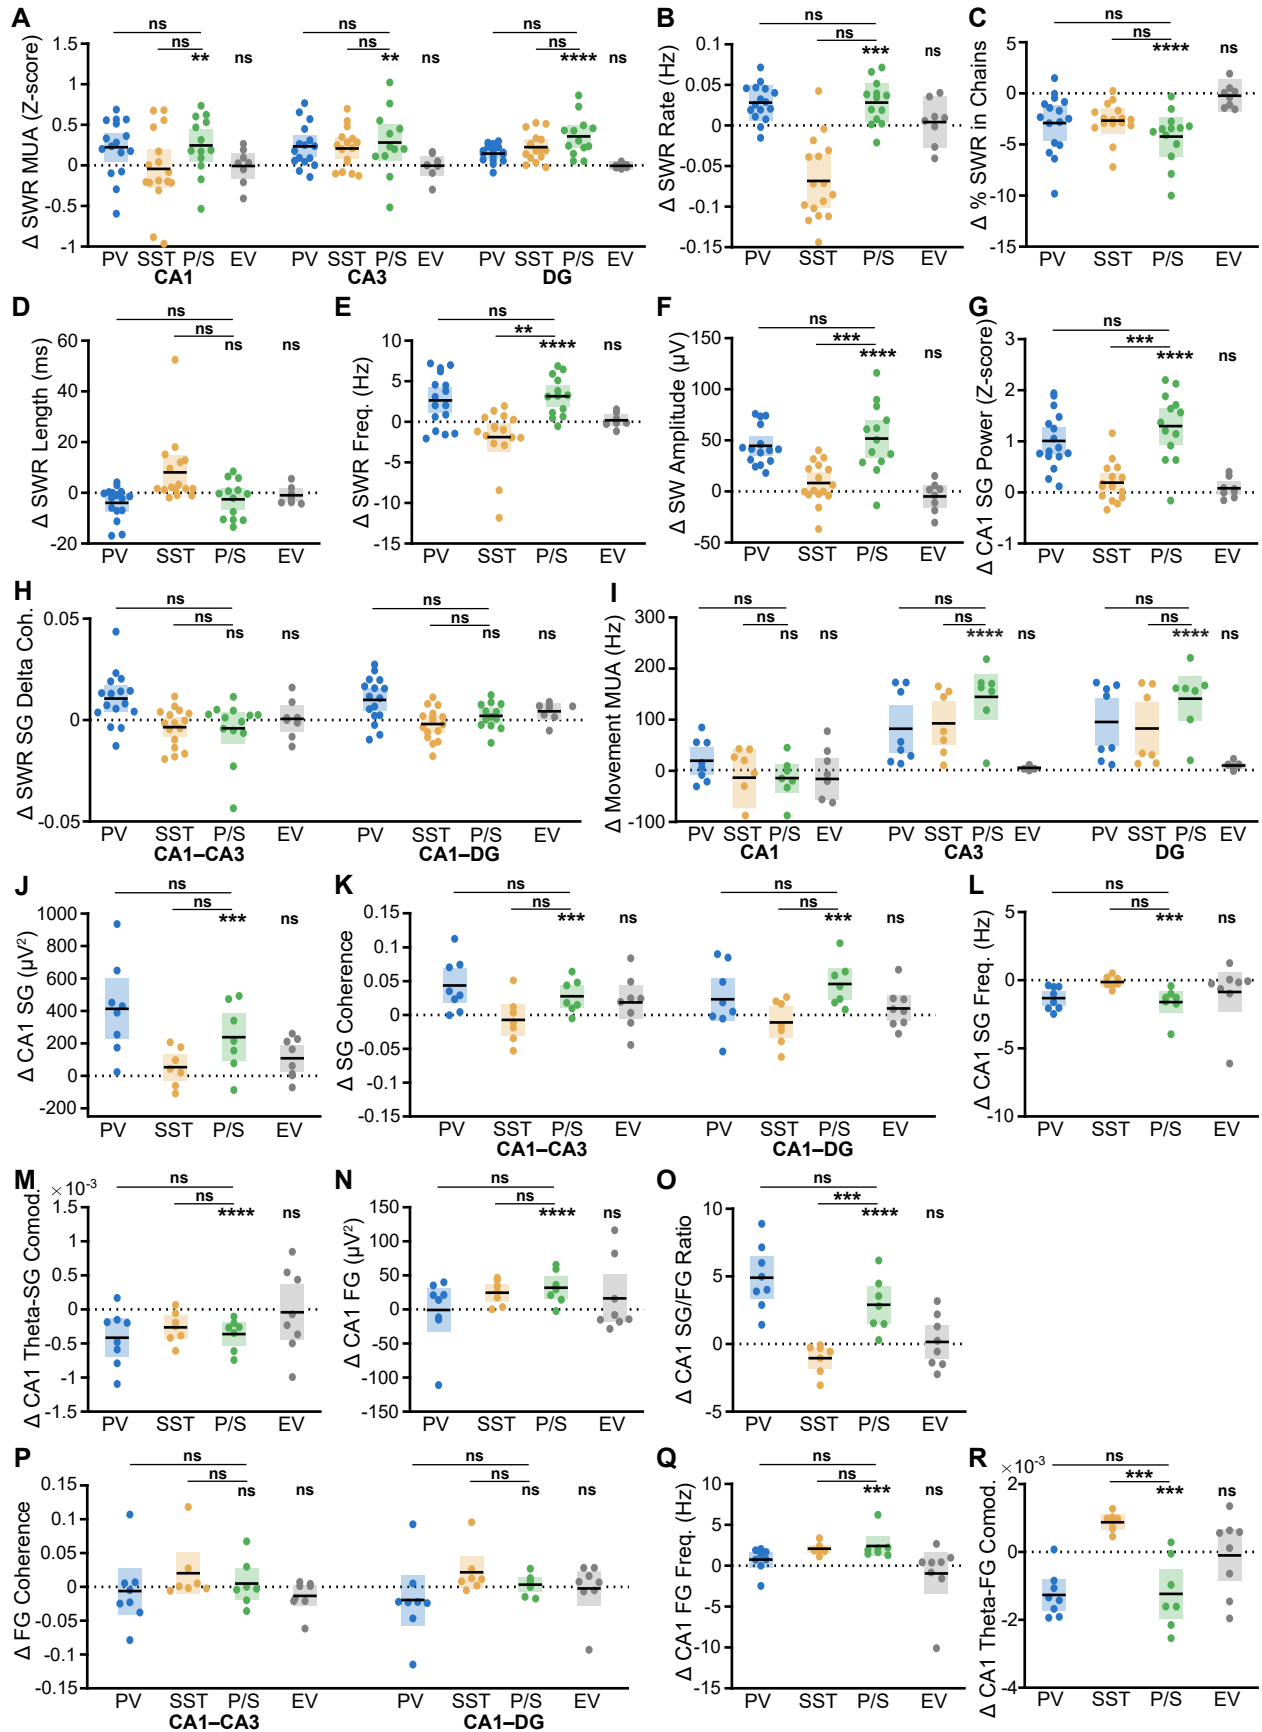

**Figure S6. Suppressing both PV<sup>+</sup> and SST<sup>+</sup> interneurons increases CA3 coupling onto CA1.**  
**Related to Figures 3–6.**

(A) Normalized recruitment to SWRs of MUA in CA1 (PV-Cre/SST-Cre (P/S):  $p = 0.0074$ ; PV vs P/S:  $p = 1$ ; SST vs P/S:  $p = 1$ ; Empty Vector (EV):  $p = 0.89$ ), CA3 (P/S:  $p = 0.0053$ ; PV vs P/S:  $p = 1$ ; SST vs P/S:  $p = 1$ ; EV:  $p = 0.66$ ), and DG (P/S:  $p = 9 \times 10^{-7}$ ; PV vs P/S:  $p = 1$ ; SST vs P/S:  $p = 1$ ; EV:  $p = 0.23$ ).

(B) SWR rate (P/S:  $p = 0.00035$ ; PV vs P/S:  $p = 0.87$ ; SST vs P/S:  $p = 0.021$ ; EV:  $p = 0.74$ ).

(C) Percent of SWRs following another SWR within 200 ms (P/S:  $p = 1.4 \times 10^{-5}$ ; PV vs P/S:  $p = 1$ ; SST vs P/S:  $p = 0.82$ ; EV:  $p = 0.77$ ).

(D) SWR length (P/S:  $p = 0.49$ ; PV vs P/S:  $p = 0.8$ ; SST vs P/S:  $p = 0.089$ ; EV:  $p = 0.68$ ).

(E) SWR instantaneous frequency (P/S:  $p = 4.2 \times 10^{-6}$ ; PV vs P/S:  $p = 0.2$ ; SST vs P/S:  $p = 0.0017$ ; EV:  $p = 0.62$ ).

(F) SW amplitude (P/S:  $p = 5.2 \times 10^{-8}$ ; PV vs P/S:  $p = 0.066$ ; SST vs P/S:  $p = 0.00055$ ; EV:  $p = 0.47$ ).

(G) Normalized SG power during SWRs in CA1 (P/S:  $p = 8.6 \times 10^{-12}$ ; PV vs P/S:  $p = 1$ ; SST vs P/S:  $p = 0.00089$ ; EV:  $p = 0.13$ ).

(H) Increase during SWRs of SG frequency band coherence between CA1 and CA3 (P/S:  $p = 0.32$ ; PV vs P/S:  $p = 1$ ; SST vs P/S:  $p = 1$ ; EV:  $p = 0.89$  and between CA1 and DG (P/S:  $p = 0.23$ ; PV vs P/S:  $p = 1$ ; SST vs P/S:  $p = 1$ ; EV:  $p = 0.13$ ).

In A–H,  $n = 16$  PV-Cre,  $n = 16$  SST-Cre,  $n = 13$  PV-Cre/SST-Cre and  $n = 8$  empty vector mice.

(I) MUA during movement in CA1 (P/S:  $p = 0.033$ ; PV vs P/S:  $p = 0.98$ ; SST vs P/S:  $p = 0.15$ ; EV:  $p = 0.23$ ), CA3 (P/S:  $p = 1.1 \times 10^{-9}$ ; PV vs P/S:  $p = 0.51$ ; SST vs P/S:  $p = 0.89$ ; EV:  $p = 0.36$ ), and DG (P/S:  $p = 1.2 \times 10^{-9}$ ; PV vs P/S:  $p = 0.43$ ; SST vs P/S:  $p = 0.031$ ; EV:  $p = 0.6$ ).

(J) SG power in CA1 (P/S:  $p = 0.00065$ ; PV vs P/S:  $p = 0.78$ ; SST vs P/S:  $p = 0.73$ ; EV:  $p = 0.067$ ).

(K) SG frequency band coherence between CA1 and CA3 (P/S:  $p = 0.00058$ ; PV vs P/S:  $p = 0.6$ ; SST vs P/S:  $p = 0.45$ ; EV:  $p = 0.13$ ) and between CA1 and DG (P/S:  $p = 0.00098$ ; PV vs P/S:  $p = 0.95$ ; SST vs P/S:  $p = 0.26$ ; EV:  $p = 0.3$ ).

(L) SG instantaneous frequency in CA1 (P/S:  $p = 0.0001$ ; PV vs P/S:  $p = 0.95$ ; SST vs P/S:  $p = 0.036$ ; EV:  $p = 0.28$ ).

(M) Theta modulation of SG power in CA1 (P/S:  $p = 7.2 \times 10^{-7}$ ; PV vs P/S:  $p = 0.66$ ; SST vs P/S:  $p = 0.93$ ; EV:  $p = 0.87$ ).

(N) FG power in CA1 (P/S:  $p = 1.6 \times 10^{-6}$ ; PV vs P/S:  $p = 0.05$ ; SST vs P/S:  $p = 1$ ; EV:  $p = 0.71$ ).

(O) Ratio of SG power to FG power in CA1 (P/S:  $p = 3.8 \times 10^{-6}$ ; PV vs P/S:  $p = 0.5$ ; SST vs P/S:  $p = 0.00086$ ; EV:  $p = 0.92$ ).

(P) FG frequency band coherence between CA1 and CA3 (P/S:  $p = 0.68$ ; PV vs P/S:  $p = 0.54$ ; SST vs P/S:  $p = 0.1$ ; EV:  $p = 0.1$ ) and between CA1 and DG (P/S:  $p = 0.68$ ; PV vs P/S:  $p = 0.13$ ; SST vs P/S:  $p = 0.16$ ; EV:  $p = 0.82$ ).

(Q) FG instantaneous frequency in CA1 (P/S:  $p = 0.00012$ ; PV vs P/S:  $p = 0.51$ ; SST vs P/S:  $p = 0.0056$ ; EV:  $p = 0.44$ ).

(R) Theta modulation of FG power in CA1 (P/S:  $p = 0.00019$ ; PV vs P/S:  $p = 0.53$ ; SST vs P/S:  $p = 0.00017$ ; EV:  $p = 0.91$ ).

In I-R,  $n = 8$  PV-Cre,  $n = 7$  SST-Cre,  $n = 7$  PV-Cre/SST-Cre and  $n = 8$  empty vector mice.

Statistical details in Table S5. F test of the LMM for treatment effects, likelihood ratio test for genotype-treatment interaction effects. \*\* $p < 0.01$ ; \*\*\* $p < 0.001$ ; \*\*\*\* $p < 0.0001$ . Central values are LMM fixed effect coefficients  $\beta \pm 95\%$  confidence intervals and individual points are the fitted conditional response for each mouse. See also Figures S7 and Table S5.

Figure S7

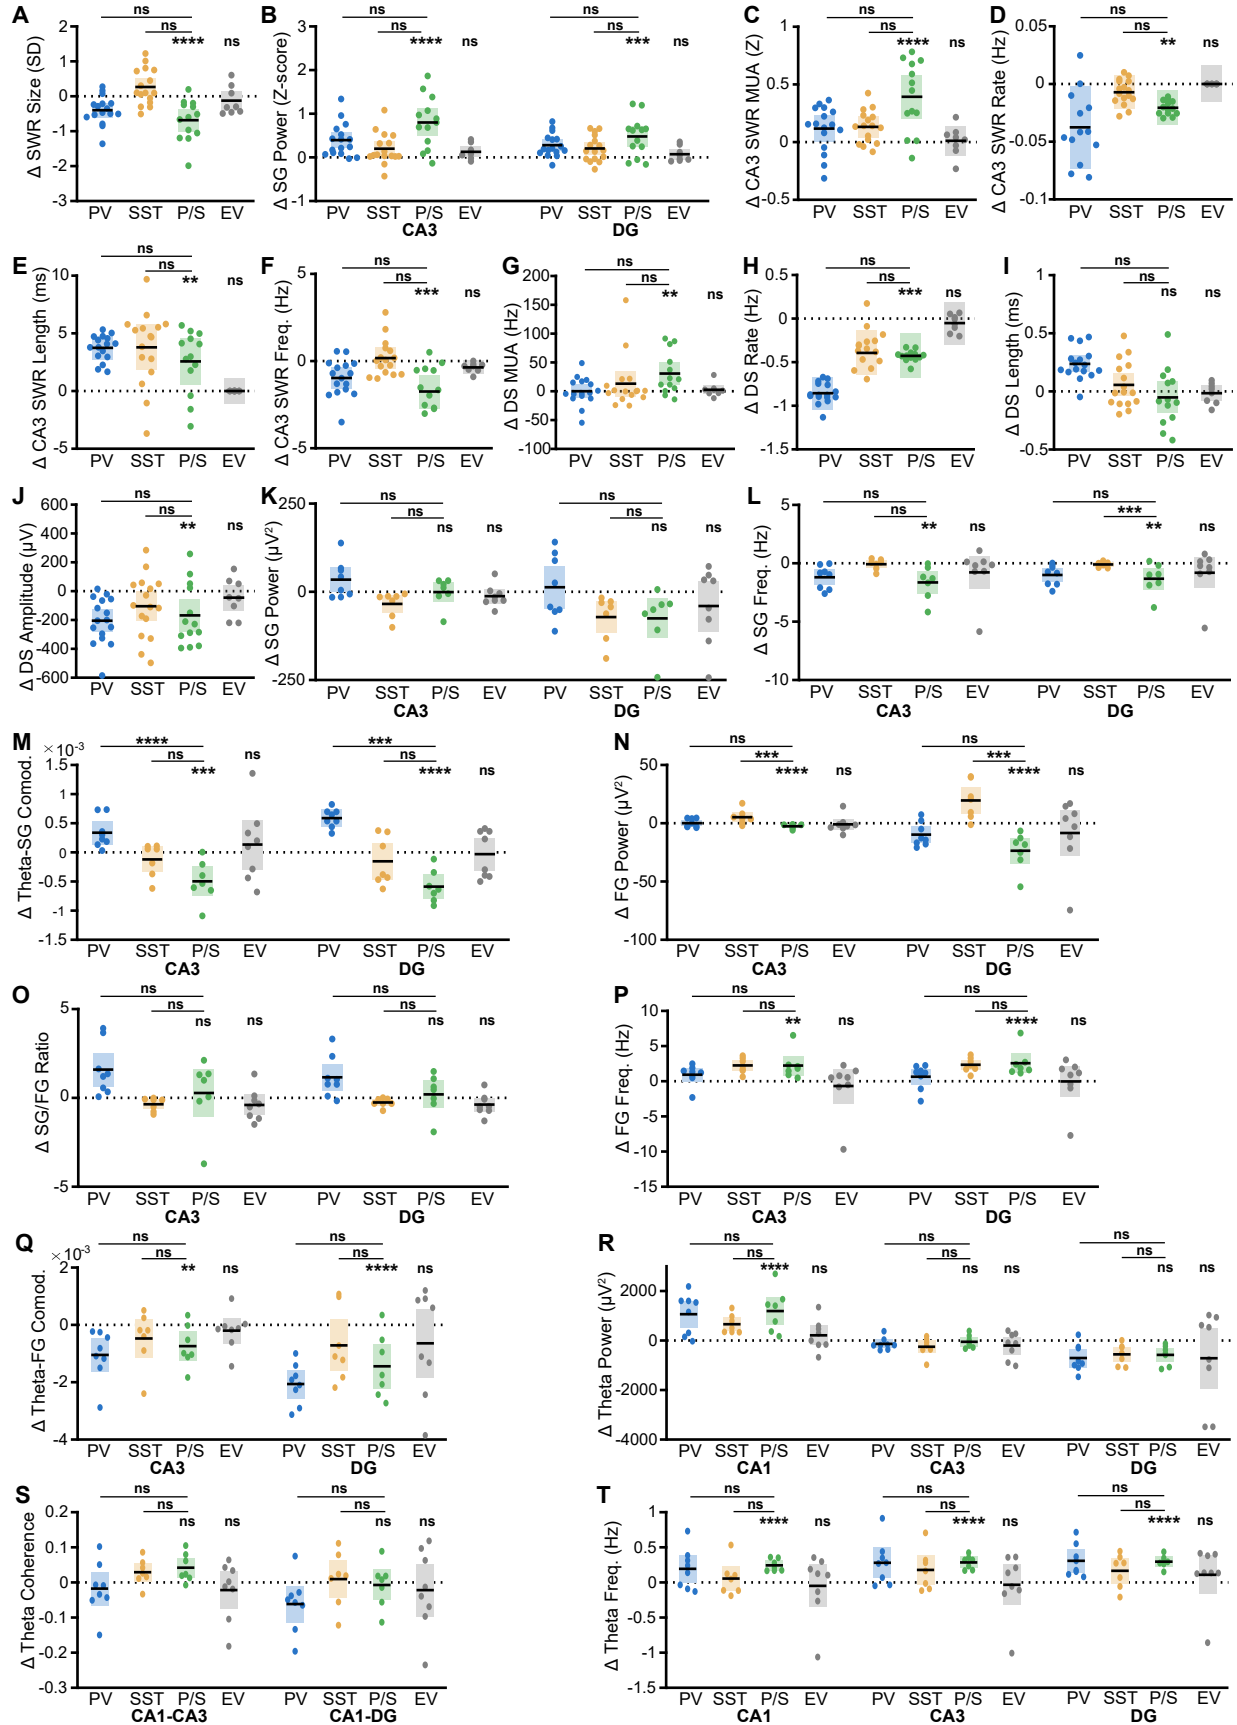

**Figure S7. Additional properties demonstrating suppressing both PV<sup>+</sup> and SST<sup>+</sup> interneurons increases CA3 coupling onto CA1. Figures 3–6 and S2–S4.**

(A) SWR size (PV-Cre/SST-Cre (P/S):  $p = 7.2 \times 10^{-6}$ ; PV vs P/S:  $p = 0.56$ ; SST vs P/S:  $p = 0.031$ ; Empty Vector (EV):  $p = 0.48$ ).

(B) Normalized SG power during SWRs in CA3 (P/S:  $p = 1.1 \times 10^{-6}$ ; PV vs P/S:  $p = 1$ ; SST vs P/S:  $p = 1$ ; EV:  $p = 0.062$ ) and DG (P/S:  $p = 0.00013$ ; PV vs P/S:  $p = 1$ ; SST vs P/S:  $p = 1$ ; EV:  $p = 0.22$ ).

(C) Normalized recruitment of CA3 MUA to CA3 SWRs (PV/SST:  $p = 4.2 \times 10^{-5}$ ; PV vs PV/SST:  $p = 0.12$ ; SST vs PV/SST:  $p = 0.23$ ; EV:  $p = 0.86$ ).

(D) CA3 SWR rate (PV/SST:  $p = 0.0066$ ; PV vs PV/SST:  $p = 0.43$ ; SST vs PV/SST:  $p = 0.52$ ; EV:  $p = 1$ ).

(E) CA3 SWR temporal length (PV/SST:  $p = 0.0031$ ; PV vs PV/SST:  $p = 0.36$ ; SST vs PV/SST:  $p = 0.3$ ; EV:  $p = 1$ ).

(F) CA3 SWR instantaneous frequency (PV/SST:  $p = 0.00039$ ; PV vs PV/SST:  $p = 0.55$ ; SST vs PV/SST:  $p = 0.062$ ; EV:  $p = 0.076$ ).

(G) DG MUA during dentate spikes (PV/SST:  $p = 0.0013$ ; PV vs PV/SST:  $p = 0.94$ ; SST vs PV/SST:  $p = 1$ ; EV:  $p = 0.98$ ).

(H) Dentate spike rate (PV/SST:  $p = 0.00094$ ; PV vs PV/SST:  $p = 0.3$ ; SST vs PV/SST:  $p = 0.87$ ; EV:  $p = 0.67$ ).

(I) Dentate spike temporal length (PV/SST:  $p = 0.45$ ; PV vs PV/SST:  $p = 0.017$ ; SST vs PV/SST:  $p = 0.62$ ; EV:  $p = 0.64$ ).

(J) Dentate spike amplitude (PV/SST:  $p = 0.0033$ ; PV vs PV/SST:  $p = 0.82$ ; SST vs PV/SST:  $p = 0.97$ ; EV:  $p = 0.31$ ).

In A–J, n = 16 PV-Cre, n = 16 SST-Cre, n = 13 PV-Cre/SST-Cre and n = 8 empty vector mice.

(K) SG power in CA3 (P/S: p = 0.84; PV vs P/S: p = 0.47; SST vs P/S: p = 0.49; EV: p = 0.087) and DG (P/S: p = 0.017; PV vs P/S: p = 0.35; SST vs P/S: p = 0.69; EV: p = 0.63).

(L) SG instantaneous frequency in CA3 (P/S: p = 0.0029; PV vs P/S: p = 0.7; SST vs P/S: p = 0.012; EV: p = 0.32) and DG (P/S: p = 0.0045; PV vs P/S: p = 0.8; SST vs P/S: p = 0.00055; EV: p = 0.27).

(M) Theta modulation of SG power in CA3 (P/S: p = 0.00036; PV vs P/S: p =  $7.3 \times 10^{-5}$ ; SST vs P/S: p = 0.0048; EV: p = 0.63) and DG (P/S: p =  $8.4 \times 10^{-11}$ ; PV vs P/S: p = 0.00018; SST vs P/S: p = 0.28; EV: p = 1).

(N) FG power in CA3 (P/S: p =  $2 \times 10^{-6}$ ; PV vs P/S: p = 0.037; SST vs P/S: p = 0.00023; EV: p = 0.36) and DG (P/S: p =  $1 \times 10^{-10}$ ; PV vs P/S: p = 0.018; SST vs P/S: p = 0.00019; EV: p = 0.64).

(O) Ratio of SG power to FG power in CA3 (P/S: p = 0.39; PV vs P/S: p = 0.52; SST vs P/S: p = 0.022; EV: p = 0.23) and DG (P/S: p = 0.29; PV vs P/S: p = 0.66; SST vs P/S: p = 0.012; EV: p = 0.15).

(P) FG instantaneous frequency in CA3 (P/S: p = 0.0013; PV vs P/S: p = 0.39; SST vs P/S: p = 0.092; EV: p = 0.51) and DG (P/S: p =  $8.6 \times 10^{-5}$ ; PV vs P/S: p = 0.061; SST vs P/S: p = 0.0089; EV: p = 0.74).

(Q) Theta modulation of FG power in CA3 (P/S: p = 0.0024; PV vs P/S: p = 0.68; SST vs P/S: p = 0.79; EV: p = 0.22) and DG (P/S: p =  $8.6 \times 10^{-5}$ ; PV vs P/S: p = 0.75; SST vs P/S: p = 0.96; EV: p = 0.35).

(R) Theta power in CA1 (P/S: p =  $2.8 \times 10^{-8}$ ; PV vs P/S: p = 0.69; SST vs P/S: p = 0.51; EV: p = 0.1), CA3 (P/S: p = 0.35; PV vs P/S: p = 0.004; SST vs P/S: p = 0.018; EV: p = 0.67), and DG (P/S: p = 0.014; PV vs P/S: p = 0.013; SST vs P/S: p = 0.028; EV: p = 0.61).



(S) Theta frequency band coherence between CA1 and CA3 (P/S:  $p = 0.0064$ ; PV vs P/S:  $p = 0.66$ ; SST vs P/S:  $p = 1$ ; EV:  $p = 0.36$ ) and between CA1 and DG (P/S:  $p = 0.66$ ; PV vs P/S:  $p = 0.9$ ; SST vs P/S:  $p = 0.91$ ; EV:  $p = 0.59$ ).

(T) Theta instantaneous frequency in CA1 (P/S:  $p = 1.4 \times 10^{-8}$ ; PV vs P/S:  $p = 0.056$ ; SST vs P/S:  $p = 0.55$ ; EV:  $p = 0.68$ ), CA3 (P/S:  $p = 5.7 \times 10^{-8}$ ; PV vs P/S:  $p = 0.16$ ; SST vs P/S:  $p = 0.86$ ; EV:  $p = 0.74$ ), and DG (P/S:  $p = 9.4 \times 10^{-12}$ ; PV vs P/S:  $p = 0.69$ ; SST vs P/S:  $p = 0.54$ ; EV:  $p = 0.8$ ).

In K-T,  $n = 8$  PV-Cre,  $n = 7$  SST-Cre,  $n = 7$  PV-Cre/SST-Cre and  $n = 8$  empty vector mice.

Statistical details in Table S5. F test of the LMM for treatment effects, likelihood ratio test for genotype-treatment interaction effects. \*\* $p < 0.01$ ; \*\*\* $p < 0.001$ ; \*\*\*\* $p < 0.0001$ . Central values are LMM fixed effect coefficients  $\beta \pm 95\%$  confidence intervals and individual points are the fitted conditional response for each mouse. See also Table S5.

**Table S1. Specificity of viral expression to PV<sup>+</sup> and SST<sup>+</sup> interneurons. Related to Figures 1 and S1.**

| Cohort | Animal       | Genotype | (mCherry+ PV+)/ PV+ | (mCherry+ SST+)/ SST+ | (mCherry+ PV+)/ mCherry+ | (mCherry+ SST+)/ mCherry+ |
|--------|--------------|----------|---------------------|-----------------------|--------------------------|---------------------------|
| 1      | Beverly      | PV-Cre   | 0.997               | -                     | 0.909                    | -                         |
| 1      | Bones        | PV-Cre   | 0.993               | -                     | 0.993                    | -                         |
| 1      | Chakotay     | PV-Cre   | 0.923               | -                     | 0.923                    | -                         |
| 1      | Nerys        | PV-Cre   | 0.944               | -                     | 0.944                    | -                         |
| 1      | Odo          | PV-Cre   | 0.882               | -                     | 0.938                    | -                         |
| 1      | Rain         | PV-Cre   | 0.867               | -                     | 0.929                    | -                         |
| 1      | SevenOfNine  | PV-Cre   | 0.875               | -                     | 0.981                    | -                         |
| 1      | Sulu         | PV-Cre   | 0.875               | -                     | 0.997                    | -                         |
| 1      | Worf         | PV-Cre   | 0.982               | -                     | 0.969                    | -                         |
| 2      | Adobo        | PV-Cre   | 0.882               | -                     | 0.917                    | -                         |
| 2      | Caraway      | PV-Cre   | 0.951               | -                     | 0.958                    | -                         |
| 2      | Chives       | PV-Cre   | 0.958               | -                     | 0.933                    | -                         |
| 2      | Cinnamon     | PV-Cre   | 0.919               | -                     | 0.983                    | -                         |
| 2      | Fenugreek    | PV-Cre   | 0.951               | -                     | 0.951                    | -                         |
| 2      | Garam Masala | PV-Cre   | 0.933               | -                     | 0.994                    | -                         |
| 2      | Salt         | PV-Cre   | 0.988               | -                     | 0.938                    | -                         |
| 3      | Aphid        | PV-Cre   | 0.944               | -                     | 0.944                    | -                         |
| 3      | Fruitfly     | PV-Cre   | 0.933               | -                     | 0.966                    | -                         |
| 3      | Grasshopper  | PV-Cre   | 0.982               | -                     | 0.964                    | -                         |
| 3      | Honeybee     | PV-Cre   | 0.952               | -                     | 0.952                    | -                         |
| 3      | Rolypoly     | PV-Cre   | 0.906               | -                     | 0.967                    | -                         |
| 1      | Garrett      | SST-Cre  | -                   | 0.800                 | -                        | 0.996                     |
| 1      | Guinan       | SST-Cre  | -                   | 0.850                 | -                        | 0.985                     |
| 1      | Keeler       | SST-Cre  | -                   | 0.826                 | -                        | 0.995                     |
| 1      | Kes          | SST-Cre  | -                   | 0.906                 | -                        | 0.988                     |
| 1      | Neelix       | SST-Cre  | -                   | 0.960                 | -                        | 0.990                     |
| 1      | OBrien       | SST-Cre  | -                   | 0.977                 | -                        | 0.973                     |
| 1      | Picard       | SST-Cre  | -                   | 0.987                 | -                        | 0.974                     |
| 1      | Quark        | SST-Cre  | -                   | 0.920                 | -                        | 0.986                     |
| 1      | Riker        | SST-Cre  | -                   | 0.904                 | -                        | 0.992                     |
| 1      | Sato         | SST-Cre  | -                   | 0.917                 | -                        | 0.946                     |
| 2      | Baharat      | SST-Cre  | -                   | 0.862                 | -                        | 0.986                     |
| 2      | Cardamom     | SST-Cre  | -                   | 0.912                 | -                        | 0.978                     |

|   |          |                    |       |       |       |       |
|---|----------|--------------------|-------|-------|-------|-------|
| 2 | Jerk     | SST-Cre            | -     | 0.963 | -     | 0.981 |
| 2 | Mace     | SST-Cre            | -     | 0.932 | -     | 0.983 |
| 2 | Tarragon | SST-Cre            | -     | 0.864 | -     | 0.989 |
| 2 | Vanilla  | SST-Cre            | -     | 0.970 | -     | 0.931 |
| 3 | Cicada   | SST-Cre            | -     | 0.946 | -     | 0.992 |
| 3 | Cricket  | SST-Cre            | -     | 0.858 | -     | 0.979 |
| 3 | Ladybug  | SST-Cre            | -     | 0.906 | -     | 0.992 |
| 3 | Mantis   | SST-Cre            | -     | 0.948 | -     | 0.977 |
| 1 | Bashir   | PV-Cre/<br>SST-Cre | 0.944 | 0.965 | 0.439 | 0.625 |
| 1 | Dax      | PV-Cre/<br>SST-Cre | 0.929 | 0.977 | 0.451 | 0.663 |
| 1 | Doctor   | PV-Cre/<br>SST-Cre | 0.926 | 0.906 | 0.387 | 0.666 |
| 1 | Scotty   | PV-Cre/<br>SST-Cre | 0.947 | 0.953 | 0.295 | 0.760 |
| 1 | TPol     | PV-Cre/<br>SST-Cre | 0.984 | 0.975 | 0.417 | 0.647 |
| 1 | Tuvok    | PV-Cre/<br>SST-Cre | 0.833 | 0.966 | 0.619 | 0.483 |
| 2 | Basil    | PV-Cre/<br>SST-Cre | 0.945 | 0.962 | 0.433 | 0.698 |
| 2 | Cumin    | PV-Cre/<br>SST-Cre | 0.937 | 0.970 | 0.547 | 0.489 |
| 2 | Dill     | PV-Cre/<br>SST-Cre | 0.981 | 0.944 | 0.484 | 0.600 |
| 2 | Nutmeg   | PV-Cre/<br>SST-Cre | 0.960 | 0.923 | 0.414 | 0.667 |
| 2 | Paprika  | PV-Cre/<br>SST-Cre | 0.938 | 0.967 | 0.535 | 0.563 |
| 2 | Parsley  | PV-Cre/<br>SST-Cre | 0.981 | 0.989 | 0.461 | 0.636 |
| 2 | Sumac    | PV-Cre/<br>SST-Cre | 0.944 | 0.931 | 0.466 | 0.596 |

**Table S2. Effects of suppressing PV<sup>+</sup> or SST<sup>+</sup> interneurons on SWR and SG detection.****Related to Figures 3, 4, S2, and S3.**

| Feature                                 | Layer   | Genotype      | Veh. Mean     | CNO Mean      | statistic | df        | test value  | p             |
|-----------------------------------------|---------|---------------|---------------|---------------|-----------|-----------|-------------|---------------|
| Ripple Freq. Mean ( $\mu\text{V}$ )     | CA1-pyr | PV-Cre        | 72.39         | 70.96         | Z         | NA        | 1.6         | 0.1           |
|                                         |         | SST-Cre       | 61.53         | 58.67         | Z         | NA        | 1.24        | 0.2           |
| Ripple Freq. SD ( $\mu\text{V}$ )       | CA1-pyr | PV-Cre        | 77.3          | 76.69         | t         | 15        | 0.32        | 0.8           |
|                                         |         | SST-Cre       | 64.04         | 65.76         | t         | 15        | 0.66        | 0.5           |
| Fast Ripple Rate (Hz)                   | CA1-pyr | <b>PV-Cre</b> | <b>0.0004</b> | <b>0.0035</b> | <b>Z</b>  | <b>NA</b> | <b>2.93</b> | <b>0.003</b>  |
|                                         |         | SST-Cre       | 0.0015        | 0.0013        | Z         | NA        | 1.17        | 0.2           |
| Rest MUA (Hz)                           | CA1-pyr | PV-Cre        | 10.61         | 10.91         | Z         | NA        | -0.41       | 0.68          |
|                                         |         | SST-Cre       | 12.28         | 11.49         | Z         | NA        | -0.16       | 0.88          |
|                                         | CA3-pyr | PV-Cre        | 8.1           | 7.4           | Z         | NA        | 1.71        | 0.09          |
|                                         |         | SST-Cre       | 6.58          | 5.75          | Z         | NA        | 1.6         | 0.11          |
|                                         | DG-gc   | PV-Cre        | 7.05          | 6.51          | Z         | NA        | 0.98        | 0.33          |
|                                         |         | SST-Cre       | 5.78          | 5.91          | Z         | NA        | 0.21        | 0.84          |
| Rest SG Freq. Mean ( $\mu\text{V}^2$ )  | CA1-sr  | <b>PV-Cre</b> | <b>109.51</b> | <b>127.6</b>  | <b>t</b>  | <b>15</b> | <b>4.03</b> | <b>0.001</b>  |
|                                         |         | SST-Cre       | 114.49        | 104.57        | t         | 15        | 1.8         | 0.09          |
|                                         | CA3     | PV-Cre        | 152.26        | 157.61        | t         | 15        | 1.49        | 0.2           |
|                                         |         | SST-Cre       | 140           | 138.21        | t         | 15        | 0.6         | 0.6           |
|                                         | DG      | PV-Cre        | 353.58        | 352.37        | t         | 15        | 0.15        | 0.9           |
|                                         |         | SST-Cre       | 338           | 338.89        | t         | 15        | 0.1         | 0.94          |
| Rest SG Freq. SD ( $\mu\text{V}^2$ )    | CA1-sr  | <b>PV-Cre</b> | <b>109.06</b> | <b>226.98</b> | <b>Z</b>  | <b>NA</b> | <b>3.52</b> | <b>0.0004</b> |
|                                         |         | SST-Cre       | 130.07        | 130.39        | t         | 15        | 0.1         | 0.96          |
|                                         | CA3     | <b>PV-Cre</b> | <b>161.1</b>  | <b>252.93</b> | <b>t</b>  | <b>15</b> | <b>3.94</b> | <b>0.001</b>  |
|                                         |         | SST-Cre       | 158.63        | 180.56        | Z         | NA        | 1.4         | 0.16          |
|                                         | DG      | <b>PV-Cre</b> | <b>343.52</b> | <b>450.84</b> | <b>t</b>  | <b>15</b> | <b>3.47</b> | <b>0.003</b>  |
|                                         |         | SST-Cre       | 355.87        | 382.82        | t         | 15        | 1.4         | 0.19          |
| CA3 Ripple Freq. Mean ( $\mu\text{V}$ ) | CA3-pyr | PVCre         | 81.72         | 79.63         | Z         | NaN       | 1.49        | 0.14          |
|                                         |         | SSTCre        | 73.57         | 68.7          | t         | 30        | 0.58        | 0.57          |
| CA3 Ripple Freq. SD ( $\mu\text{V}$ )   | CA3-pyr | PVCre         | 46.96         | 49            | Z         | NaN       | 0.06        | 0.95          |
|                                         |         | SSTCre        | 42.88         | 42.01         | t         | 30        | 0.16        | 0.88          |
| DS Freq. Mean ( $\mu\text{V}$ )         | DG-gc   | PVCre         | 0             | -0.05         | Z         | NaN       | 2.43        | 0.02          |
|                                         |         | SSTCre        | 0             | 0.01          | Z         | NaN       | -0.43       | 0.66          |
| DS Freq. SD ( $\mu\text{V}$ )           | DG-gc   | PVCre         | 1903.24       | 1984.49       | t         | 30        | -0.56       | 0.58          |
|                                         |         | SSTCre        | 1807.8        | 1891.84       | t         | 30        | -0.38       | 0.71          |

Paired t tests when the test statistic given is t and Wilcoxon matched pairs signed rank test when the test statistic given is Z. Significant comparisons are bolded. N = 16 PV-Cre and n = 16 SST-Cre mice.

**Table S3. Statistical details for Figures 2–6 and S2–S5.**

| Rest Features                         | PV-Cre (n = 16) |        | SST-Cre (n = 16) |       | PV-Cre vs SST-Cre |           |
|---------------------------------------|-----------------|--------|------------------|-------|-------------------|-----------|
|                                       | df              | F      | df               | F     | df                | $\chi^2$  |
| CA1-sr CSD Source                     | 28124           | 11.72  | 44670            | 16.59 | 9                 | -52369.26 |
| CA1-sr CSD Sink                       | 28124           | 14.72  | 44670            | 59.61 | 9                 | -37362.77 |
| CA1 MUA during SWRs (Z-score)         | 112503          | 2.33   | 124415           | 0.54  | 9                 | 19.33     |
| CA3 MUA during SWRs (Z-score)         | 112503          | 11.36  | 124415           | 11.33 | 9                 | 14.84     |
| DG MUA during SWRs (Z-score)          | 112503          | 20.64  | 124415           | 17.21 | 9                 | 16.38     |
| SWR Rate (Hz)                         | 4023            | 22.81  | 4496             | 16.65 | 9                 | 27.92     |
| % SWR in Chains                       | 112503          | 10.79  | 124415           | 17.78 | 9                 | 2.32      |
| SWR Length (ms)                       | 112503          | 4.54   | 124415           | 9.3   | 9                 | 30.65     |
| SWR Frequency (Hz)                    | 112503          | 10.48  | 124415           | 4.56  | 9                 | 19.96     |
| SW Amplitude ( $\mu$ V)               | 381794          | 115.42 | 428868           | 1.34  | 9                 | 23.57     |
| SWR CA1 SG Power (Z-score)            | 381794          | 99.81  | 428868           | 2.14  | 9                 | 27.9      |
| SWR CA1–CA3 Delta Coh.                | 903633          | 10.59  | 1182100          | 1.89  | 9                 | 39.49     |
| SWR CA1–DG Delta Coh.                 | 843957          | 10.89  | 866644           | 0.61  | 9                 | 24.47     |
| SWR Size (SD)                         | 112503          | 12.2   | 124415           | 3.28  | 9                 | 21.36     |
| SWR CA3 SG Power (Z-score)            | 360566          | 18.19  | 453379           | 3.32  | 9                 | 3.15      |
| SWR DG SG Power (Z-score)             | 327914          | 17.98  | 317642           | 7.61  | 9                 | 3.3       |
| CA3 MUA during CA3 SWRs (Z-score)     | 82196           | 12.34  | 95385            | 7.5   | 9                 | -50950.7  |
| CA3 SWR Rate (Hz)                     | 4023            | 11.45  | 4496             | 0.09  | 9                 | 11        |
| CA3 SWR Length (ms)                   | 82196           | 54.88  | 95381            | 13.42 | 9                 | 7.27      |
| CA3 SWR Frequency (Hz)                | 82196           | 9.7    | 95381            | 0.35  | 9                 | 11.02     |
| DG MUA during DS (Hz)                 | 2245583         | 0.53   | 2272359          | 1.26  | 9                 | 13.35     |
| DS Rate (Hz)                          | 4023            | 81.28  | 4497             | 9.02  | 9                 | 11.03     |
| DS Length (ms)                        | 2245583         | 44.43  | 2272359          | 1.25  | 9                 | 11.77     |
| DS Amplitude ( $\mu$ V)               | 2245583         | 27.49  | 2272359          | 4.04  | 9                 | 7.28      |
| Run Features                          | PV-Cre (n = 8)  |        | SST-Cre (n = 7)  |       | PV-Cre vs SST-Cre |           |
|                                       | df              | F      | df               | F     | df                | $\chi^2$  |
| CA1 MUA (Hz)                          | 92444           | 0.13   | 145684           | 0.01  | 9                 | 10.15     |
| CA3 MUA (Hz)                          | 92444           | 12.06  | 145684           | 7.89  | 9                 | 4.55      |
| DG MUA (Hz)                           | 92444           | 13.62  | 145684           | 7.47  | 9                 | 7.44      |
| CA1 SG Power ( $\mu$ V <sup>2</sup> ) | 31496           | 22.12  | 51582            | 2.33  | 9                 | 41.12     |
| CA1–CA3 SG Coh.                       | 110477          | 13.23  | 166284           | 0.27  | 9                 | 7.77      |
| CA1–DG SG Coh.                        | 116710          | 2.96   | 185217           | 1.07  | 9                 | 11.26     |
| CA1 SG Freq. (Hz)                     | 1038019         | 22.17  | 1888216          | 0.33  | 9                 | 23.06     |
| CA1 Theta–SG Comod.                   | 31496           | 2.43   | 51582            | 11.2  | 9                 | 3.26      |
| CA1 FG Power ( $\mu$ V <sup>2</sup> ) | 31496           | 1.21   | 51582            | 17.24 | 9                 | 29.45     |
| CA1 SG/FG ratio                       | 31496           | 105.64 | 51582            | 14.67 | 9                 | 40.05     |
| CA1–CA3 FG Coh.                       | 105772          | 0.04   | 185217           | 1.66  | 9                 | 11.57     |
| CA1–DG FG Coh.                        | 95893           | 1.21   | 166284           | 3.15  | 9                 | 8.66      |

|                               |         |       |         |       |   |       |
|-------------------------------|---------|-------|---------|-------|---|-------|
| CA1 FG Freq. (Hz)             | 2150099 | 3.52  | 3752150 | 70.63 | 9 | 16.11 |
| CA1 Theta-FG Comod.           | 31496   | 6.68  | 51582   | 83.1  | 9 | 33.69 |
| CA3 SG Power ( $\mu V^2$ )    | 34017   | 2.07  | 48268   | 16.36 | 9 | 28.22 |
| DG SG Power ( $\mu V^2$ )     | 34037   | 0.45  | 49647   | 27.87 | 9 | 30.09 |
| CA3 SG Freq. (Hz)             | 1218601 | 13.56 | 1864300 | 0.07  | 9 | 25.49 |
| DG SG Freq. (Hz)              | 1230393 | 12.13 | 1924686 | 0.81  | 9 | 32.71 |
| CA3 Theta-SG Comod.           | 34017   | 10.62 | 48268   | 1.99  | 9 | 23.64 |
| DG Theta-SG Comod.            | 34037   | 13.1  | 49647   | 1.48  | 9 | 23.38 |
| CA3 FG Power ( $\mu V^2$ )    | 34017   | 0.64  | 48268   | 7.12  | 9 | 25.22 |
| DG FG Power ( $\mu V^2$ )     | 34037   | 0.06  | 49647   | 18.28 | 9 | 25.42 |
| CA3 SG/FG ratio               | 34017   | 12.72 | 48268   | 7.24  | 9 | 26.11 |
| DG SG/FG ratio                | 34037   | 13    | 49647   | 9.51  | 9 | 29.04 |
| CA3 FG Freq. (Hz)             | 2593454 | 5.43  | 3656285 | 35.46 | 9 | 14.05 |
| DG FG Freq. (Hz)              | 2577250 | 1.42  | 3768666 | 43.56 | 9 | 16.25 |
| CA3 Theta-FG Comod.           | 34017   | 12.5  | 48268   | 1.72  | 9 | 25.31 |
| DG Theta-FG Comod.            | 34037   | 42.41 | 49647   | 2.51  | 9 | 29.54 |
| CA1 Theta Power ( $\mu V^2$ ) | 31496   | 12.96 | 51582   | 16.78 | 9 | 8.15  |
| CA3 Theta Power ( $\mu V^2$ ) | 34017   | 0.06  | 48268   | 2.25  | 9 | 10.68 |
| DG Theta Power ( $\mu V^2$ )  | 34037   | 2.4   | 49647   | 6.69  | 9 | 4.84  |
| CA1-CA3 Theta Coh.            | 95893   | 0.32  | 166284  | 3.94  | 9 | 7.13  |
| CA1-DG Theta Coh.             | 105772  | 5.11  | 185217  | 0.09  | 9 | 4.29  |
| CA1 Theta Freq. (Hz)          | 308329  | 6.99  | 574674  | 1.13  | 9 | 16.36 |
| CA3 Theta Freq. (Hz)          | 296280  | 7.11  | 416176  | 2.68  | 9 | 10.69 |
| DG Theta Freq. (Hz)           | 297566  | 11.76 | 432042  | 2.68  | 9 | 6.64  |

F test of the LMM for treatment effects, likelihood ratio test for genotype-treatment interaction effects.

**Table S4. Differences between genotypes during vehicle treatment. Related to Figures 3–6 and S2–S5.**

| Rest Features                         | PV mean<br>(n = 16) | SST mean<br>(n = 16) | df      | F                     | p     |
|---------------------------------------|---------------------|----------------------|---------|-----------------------|-------|
| CA1 MUA during SWRs (Z-score)         | 2.64                | 1.44                 | 138109  | 2.2                   | 0.14  |
| CA3 MUA during SWRs (Z-score)         | 1.89                | 0.88                 | 138109  | 4.1                   | 0.042 |
| DG MUA during SWRs (Z-score)          | 1.74                | 0.51                 | 138109  | 0.082                 | 0.77  |
| SWR Rate (Hz)                         | 0.45                | 0.44                 | 4757    | 1.5                   | 0.22  |
| % SWR in Chains                       | 0.2                 | 0.21                 | 137661  | 0.26                  | 0.61  |
| SWR Length (ms)                       | 102.99              | 101.34               | 137661  | 0.0073                | 0.93  |
| SWR Frequency (Hz)                    | 156.24              | 156.15               | 137661  | 0.0004                | 0.98  |
| SW Amplitude ( $\mu$ V)               | 375.21              | 384.95               | 471767  | 0.13                  | 0.72  |
| SWR CA1 SG Power (Z-score)            | 1.31                | 1.25                 | 471767  | 0.045                 | 0.83  |
| SWR CA1–CA3 Delta Coh.                | 0.013               | 0.011                | 1189551 | 0.19                  | 0.66  |
| SWR CA1–DG Delta Coh.                 | 0.011               | 0.0088               | 976070  | 2.4                   | 0.12  |
| SWR Size (SD)                         | 5.93                | 5.93                 | 137661  | 0.052                 | 0.82  |
| SWR CA3 SG Power (Z-score)            | 0.91                | 0.85                 | 473237  | 3                     | 0.085 |
| SWR DG SG Power (Z-score)             | 0.65                | 0.67                 | 359153  | 0.29                  | 0.59  |
| CA3 MUA during CA3 SWRs<br>(Z-score)  | 1.07                | 0.93                 | 103414  | 0.23                  | 0.63  |
| CA3 SWR Rate (Hz)                     | 0.33                | 0.33                 | 4831    | 0.029                 | 0.86  |
| CA3 SWR Length (ms)                   | 82.64               | 85.44                | 105233  | 1.1                   | 0.29  |
| CA3 SWR Frequency (Hz)                | 150.22              | 151.34               | 105233  | 0.58                  | 0.45  |
| DG MUA during DS (Hz)                 | 97.11               | 83.92                | 2637957 | 0.13                  | 0.72  |
| DS Rate (Hz)                          | 9.18                | 8.45                 | 4832    | 5.2                   | 0.022 |
| DS Length (ms)                        | 18.67               | 18.93                | 2637957 | 3.4                   | 0.066 |
| DS Amplitude ( $\mu$ V)               | 2822.72             | 2441.86              | 2637957 | 2.8                   | 0.092 |
| Run Features                          | PV mean<br>(n = 8)  | SST mean<br>(n = 7)  | df      | F                     | p     |
| CA1 MUA (Hz)                          | 87.61               | 136.28               | 155440  | 2.38                  | 0.12  |
| CA3 MUA (Hz)                          | 283.88              | 216.70               | 155440  | 1.79                  | 0.18  |
| DG MUA (Hz)                           | 294.51              | 296.34               | 155400  | 0.00                  | 0.99  |
| CA1 SG Power ( $\mu$ V <sup>2</sup> ) | 512.08              | 400.01               | 28766   | 0.77                  | 0.38  |
| CA1–CA3 SG Coh.                       | 0.6                 | 0.6                  | 100543  | 4.20x10 <sup>-5</sup> | 0.99  |
| CA1–DG SG Coh.                        | 0.59                | 0.58                 | 114500  | 0.04                  | 0.84  |
| CA1 SG Freq. (Hz)                     | 40.24               | 41.2                 | 1066217 | 4.6                   | 0.032 |
| CA1 Theta–SG Comod.                   | 0.0051              | 0.0049               | 28766   | 0.0015                | 0.97  |
| CA1 FG Power ( $\mu$ V <sup>2</sup> ) | 79.36               | 63.72                | 28766   | 0.34                  | 0.56  |
| CA1 SG/FG ratio                       | 6.35                | 5.71                 | 28766   | 1                     | 0.32  |
| CA1–CA3 FG Coh.                       | 0.54                | 0.56                 | 110360  | 0.81                  | 0.37  |
| CA1–DG FG Coh.                        | 0.52                | 0.53                 | 95023   | 0.31                  | 0.58  |

|                                     |              |             |                |           |                |
|-------------------------------------|--------------|-------------|----------------|-----------|----------------|
| CA1 FG Freq (Hz)                    | 79.7         | 78.93       | 2095627        | 1.3       | 0.25           |
| CA1 Theta–FG Comod.                 | 0.0079       | 0.0074      | 28766          | 0.036     | 0.85           |
| CA3 SG Power ( $\mu\text{V}^2$ )    | 115.94       | 134.21      | 31822          | 1.2       | 0.28           |
| DG SG Power ( $\mu\text{V}^2$ )     | 313.19       | 303.08      | 31169          | 0.11      | 0.74           |
| <b>CA3 SG Freq. (Hz)</b>            | <b>40.54</b> | <b>41.9</b> | <b>1089935</b> | <b>12</b> | <b>0.00042</b> |
| <b>DG SG Freq. (Hz)</b>             | <b>41.06</b> | <b>42.4</b> | <b>1241681</b> | <b>13</b> | <b>0.00025</b> |
| CA3 Theta–SG Comod.                 | 0.0049       | 0.0053      | 31822          | 2.2       | 0.14           |
| DG Theta–SG Comod.                  | 0.0047       | 0.0053      | 31169          | 4.5       | 0.034          |
| CA3 FG Power ( $\mu\text{V}^2$ )    | 18.3         | 27.1        | 31822          | 5.6       | 0.018          |
| DG FG Power ( $\mu\text{V}^2$ )     | 64.54        | 73.9        | 31169          | 2.3       | 0.13           |
| <b>CA3 SG/FG ratio</b>              | <b>6.2</b>   | <b>3.99</b> | <b>31822</b>   | <b>11</b> | <b>0.00078</b> |
| <b>DG SG/FG ratio</b>               | <b>5.16</b>  | <b>3.4</b>  | <b>31169</b>   | <b>11</b> | <b>0.00071</b> |
| CA3 FG Freq. (Hz)                   | 81.99        | 80.18       | 2155990        | 5.2       | 0.022          |
| DG FG Freq. (Hz)                    | 81.75        | 80.42       | 2381526        | 6.7       | 0.0095         |
| CA3 Theta–FG Comod.                 | 0.007        | 0.0085      | 31822          | 4         | 0.046          |
| DG Theta–FG Comod.                  | 0.0086       | 0.009       | 31169          | 0.94      | 0.33           |
| CA1 Theta Power ( $\mu\text{V}^2$ ) | 811.3        | 613.97      | 28766          | 0.21      | 0.64           |
| CA3 Theta Power ( $\mu\text{V}^2$ ) | 878.78       | 1090.14     | 31822          | 2.3       | 0.13           |
| DG Theta Power ( $\mu\text{V}^2$ )  | 2036.8       | 1927.36     | 31169          | 0.35      | 0.56           |
| CA1–CA3 Theta Coh.                  | 0.81         | 0.8         | 95023          | 0.046     | 0.83           |
| CA1–DG Theta Coh.                   | 0.79         | 0.77        | 110360         | 0.39      | 0.53           |
| CA1 Theta Freq. (Hz)                | 9.18         | 9.09        | 312211         | 0.34      | 0.56           |
| CA3 Theta Freq. (Hz)                | 9.15         | 9.03        | 246172         | 0.38      | 0.54           |
| DG Theta Freq. (Hz)                 | 9.24         | 9.21        | 270460         | 0.056     | 0.81           |

F test of the LMM for genotype effects. Significant comparisons are bolded.



**Table S5. Statistical details for Figures S6 and S7. Related to Figures 3-6 and Figures S6 and**

**S7.**

| Rest Features                         | PV-Cre/ SST-Cre (n = 13) |       | PV-Cre vs PV-Cre/ SST-Cre |          | SST-Cre vs PV-Cre/ SST-Cre |          | Empty Vector (n = 8) |      |
|---------------------------------------|--------------------------|-------|---------------------------|----------|----------------------------|----------|----------------------|------|
|                                       | df                       | F     | df                        | $\chi^2$ | df                         | $\chi^2$ | df                   | F    |
| MUA during SWRs (Z-score)             | 76435                    | 7.16  | 9                         | -68724   | 9                          | -54461   | 21480                | 0.02 |
| MUA during SWRs (Z-score)             | 76435                    | 7.78  | 9                         | -49460   | 9                          | -19733   | 21480                | 0.19 |
| MUA during SWRs (Z-score)             | 76435                    | 24.13 | 9                         | -120845  | 9                          | -6232    | 21480                | 1.42 |
| SWR Rate (Hz)                         | 2709                     | 12.79 | 9                         | 4.51     | 9                          | 19.54    | 892                  | 0.11 |
| % SWR in Chains                       | 75927                    | 18.82 | 9                         | 1.45     | 9                          | 5.19     | 21310                | 0.08 |
| SWR Length (ms)                       | 75927                    | 0.48  | 9                         | 5.36     | 9                          | 15.06    | 21310                | 0.17 |
| SWR Frequency (Hz)                    | 75927                    | 21.2  | 9                         | 12.28    | 9                          | 26.56    | 21310                | 0.25 |
| SW Amplitude ( $\mu$ V)               | 255972                   | 29.64 | 9                         | 16.03    | 9                          | 29.41    | 66351                | 0.52 |
| CA1-sr SG Power (Z-score)             | 255972                   | 46.62 | 9                         | -26019   | 9                          | 28.18    | 66351                | 2.33 |
| SWR Delta SG Coherence                | 750476                   | 0.99  | 9                         | -40005   | 9                          | -35500   | 168587               | 0.02 |
| SWR Delta SG Coherence                | 524754                   | 1.44  | 9                         | -97130   | 9                          | -63661   | 142513               | 2.35 |
| SWR Size (SD)                         | 75927                    | 20.15 | 9                         | 7.7      | 9                          | 18.37    | 21310                | 0.49 |
| SG Power (Z-score)                    | 303136                   | 23.76 | 9                         | -15146   | 9                          | -26292   | 84625                | 3.48 |
| SG Power (Z-score)                    | 209470                   | 14.65 | 9                         | -5617    | 9                          | -291     | 68253                | 1.5  |
| CA3 MUA during CA3 SWRs (Z-score)     | 51194                    | 16.77 | 9                         | 14.11    | 9                          | 11.76    | 17339                | 0.03 |
| CA3 SWR Rate (Hz)                     | 2709                     | 7.4   | 9                         | 9.08     | 9                          | 8.17     | 872                  | 0    |
| CA3 SWR Length (ms)                   | 51194                    | 8.74  | 9                         | 9.87     | 9                          | 10.7     | 16608                | 0    |
| CA3 SWR Frequency (Hz)                | 51194                    | 12.6  | 9                         | 7.86     | 9                          | 16.23    | 17335                | 3.16 |
| DG MUA during DS (Hz)                 | 1484214                  | 10.31 | 9                         | 3.57     | 9                          | 1.58     | 424321               | 0    |
| DS Rate (Hz)                          | 2709                     | 10.96 | 9                         | 10.7     | 9                          | 4.52     | 892                  | 0.18 |
| DS Length (ms)                        | 1484214                  | 0.58  | 9                         | 20.09    | 9                          | 7.12     | 424321               | 0.22 |
| DS Amplitude ( $\mu$ V)               | 1484214                  | 8.66  | 9                         | 5.21     | 9                          | 2.75     | 424321               | 1.02 |
| Run Features                          | PV-Cre/ SST-Cre (n = 7)  |       | PV-Cre vs PV-Cre/ SST-Cre |          | SST-Cre vs PV-Cre/ SST-Cre |          | Empty Vector (n = 8) |      |
|                                       | df                       | F     | df                        | $\chi^2$ | df                         | $\chi^2$ | df                   | F    |
| CA1 MUA (Hz)                          | 140065                   | 4.54  | 9                         | 2.69     | 9                          | 13.32    | 120735               | 1.44 |
| CA3 MUA (Hz)                          | 140065                   | 37.10 | 9                         | 8.28     | 9                          | 4.24     | 120735               | 0.85 |
| DG MUA (Hz)                           | 140065                   | 36.95 | 9                         | 9.11     | 9                          | 18.41    | 120735               | 0.27 |
| CA1 SG Power ( $\mu$ V <sup>2</sup> ) | 50966                    | 11.62 | 9                         | 5.56     | 9                          | 6.07     | 45384                | 3.36 |
| CA1–CA3 SG Coh.                       | 204656                   | 11.84 | 9                         | 7.35     | 9                          | 8.89     | 178143               | 2.26 |
| CA1–DG SG Coh.                        | 170411                   | 10.86 | 9                         | 3.28     | 9                          | 11.26    | 167832               | 1.06 |
| CA1 SG Freq. (Hz)                     | 1817692                  | 15.1  | 9                         | 3.34     | 9                          | 17.93    | 1649935              | 1.14 |
| CA1 Theta–SG Comod.                   | 50966                    | 24.58 | 9                         | 6.73     | 9                          | 3.76     | 45384                | 0.02 |

|                               |         |       |   |       |   |       |         |      |
|-------------------------------|---------|-------|---|-------|---|-------|---------|------|
| CA1 FG Power ( $\mu V^2$ )    | 50966   | 23.04 | 9 | 16.9  | 9 | 1.37  | 49047   | 0.13 |
| CA1 SG/FG ratio               | 50966   | 21.37 | 9 | 8.33  | 9 | 28.28 | 49047   | 0.01 |
| CA1-CA3 FG Coh.               | 170411  | 0.17  | 9 | 7.95  | 9 | 14.52 | 173082  | 2.64 |
| CA1-DG FG Coh.                | 204656  | 0.17  | 9 | 13.66 | 9 | 12.98 | 185143  | 0.05 |
| CA1 FG Freq. (Hz)             | 3744547 | 14.73 | 9 | 8.25  | 9 | 23.3  | 3333362 | 0.61 |
| CA1 Theta-FG Comod.           | 50966   | 13.94 | 9 | 7.99  | 9 | 32.4  | 45384   | 0.01 |
| CA3 SG Power ( $\mu V^2$ )    | 58724   | 0.04  | 9 | 8.69  | 9 | 8.4   | 59762   | 2.92 |
| DG SG Power ( $\mu V^2$ )     | 48576   | 5.71  | 9 | 9.99  | 9 | 6.48  | 51661   | 0.24 |
| CA3 SG Freq. (Hz)             | 2137020 | 8.89  | 9 | 6.36  | 9 | 21.1  | 2220964 | 1    |
| DG SG Freq. (Hz)              | 1790505 | 8.08  | 9 | 5.33  | 9 | 29.44 | 1961970 | 1.2  |
| CA3 Theta-SG Comod.           | 58724   | 12.75 | 9 | 34.51 | 9 | 23.71 | 59762   | 0.23 |
| DG Theta-SG Comod.            | 48576   | 42.17 | 9 | 32.26 | 9 | 10.98 | 51661   | 0    |
| CA3 FG Power ( $\mu V^2$ )    | 58724   | 22.57 | 9 | 17.82 | 9 | 31.67 | 59762   | 0.86 |
| DG FG Power ( $\mu V^2$ )     | 48576   | 41.75 | 9 | 19.95 | 9 | 32.09 | 51661   | 0.21 |
| CA3 SG/FG ratio               | 58724   | 0.74  | 9 | 8.14  | 9 | 19.44 | 59762   | 1.42 |
| DG SG/FG ratio                | 48576   | 1.11  | 9 | 6.75  | 9 | 21.1  | 51661   | 2.11 |
| CA3 FG Freq. (Hz)             | 4425768 | 10.28 | 9 | 9.55  | 9 | 14.96 | 4511384 | 0.43 |
| DG FG Freq. (Hz)              | 3665938 | 15.43 | 9 | 16.3  | 9 | 22    | 3911662 | 0.11 |
| CA3 Theta-FG Comod.           | 58724   | 9.18  | 9 | 6.54  | 9 | 5.48  | 59762   | 1.48 |
| DG Theta-FG Comod.            | 48576   | 15.43 | 9 | 5.86  | 9 | 3.03  | 51661   | 0.88 |
| CA1 Theta Power ( $\mu V^2$ ) | 50966   | 30.84 | 9 | 6.49  | 9 | 8.21  | 49047   | 2.7  |
| CA3 Theta Power ( $\mu V^2$ ) | 58724   | 0.86  | 9 | 24.22 | 9 | 20.06 | 59762   | 0.18 |
| DG Theta Power ( $\mu V^2$ )  | 48576   | 6.03  | 9 | 20.96 | 9 | 18.68 | 51661   | 0.26 |
| CA1-CA3 Theta Coh.            | 204656  | 7.44  | 9 | 6.77  | 9 | 1.07  | 185143  | 0.84 |
| CA1-DG Theta Coh.             | 170411  | 0.19  | 9 | 4.17  | 9 | 3.98  | 173082  | 0.29 |
| CA1 Theta Freq. (Hz)          | 529462  | 32.2  | 9 | 16.59 | 9 | 7.85  | 473424  | 0.17 |
| CA3 Theta Freq. (Hz)          | 508905  | 29.47 | 9 | 13.03 | 9 | 4.72  | 513283  | 0.11 |
| DG Theta Freq. (Hz)           | 421267  | 46.45 | 9 | 6.52  | 9 | 7.92  | 451191  | 0.06 |

F test of the LMM for treatment effects, likelihood ratio test for genotype-treatment interaction effects.

**Table S6. Sex differences across all mice during vehicle treatment. Related to Figures 3–6 and S2–S7.**

| Rest Features                         | F mean<br>(n = 26) | M mean<br>(n = 27) | df            | F        | p             |
|---------------------------------------|--------------------|--------------------|---------------|----------|---------------|
| CA1 MUA during SWRs (Z-score)         | 1.97               | 1.86               | 189147        | 3.2      | 0.074         |
| CA3 MUA during SWRs (Z-score)         | 1.28               | 1.13               | 189147        | 0.35     | 0.56          |
| DG MUA during SWRs (Z-score)          | 0.98               | 0.96               | 189147        | 2.1      | 0.15          |
| SWR Rate (Hz)                         | 0.42               | 0.44               | 6724          | 0.89     | 0.34          |
| % SWR in Chains                       | 0.21               | 0.21               | 189147        | 0.16     | 0.69          |
| SWR Length (ms)                       | 101.02             | 102.9              | 189147        | 0.31     | 0.58          |
| SWR Frequency (Hz)                    | 155.74             | 155.45             | 189147        | 0.07     | 0.79          |
| SW Amplitude ( $\mu$ V)               | 356.84             | 416.36             | 642232        | 4.6      | 0.032         |
| SWR CA1 SG Power (Z-score)            | 1.31               | 1.22               | 642232        | 1.2      | 0.27          |
| SWR CA1–CA3 Delta Coh.                | 0.01               | 0.01               | 1666279       | 0.16     | 0.69          |
| SWR CA1–DG Delta Coh.                 | 0.01               | 0.01               | 1323512       | 0.28     | 0.6           |
| SWR Size (SD)                         | <b>6.36</b>        | <b>5.92</b>        | <b>189147</b> | <b>8</b> | <b>0.0046</b> |
| SWR CA3 SG Power (Z-score)            | 0.89               | 0.92               | 679511        | 0.51     | 0.48          |
| SWR DG SG Power (Z-score)             | 0.66               | 0.69               | 506782        | 0.07     | 0.79          |
| CA3 MUA during CA3 SWRs<br>(Z-score)  | 1.08               | 0.93               | 141580        | 0.51     | 0.47          |
| CA3 SWR Rate (Hz)                     | 0.31               | 0.32               | 6795          | 0.2      | 0.65          |
| CA3 SWR Length (ms)                   | 79.98              | 84.81              | 143326        | 5.9      | 0.015         |
| CA3 SWR Frequency (Hz)                | 151.34             | 151.15             | 143326        | 0.023    | 0.88          |
| DG MUA during DS (Hz)                 | 63.96              | 115.84             | 3704734       | 3.6      | 0.058         |
| DS Rate (Hz)                          | 8.35               | 8.82               | 6799          | 1.7      | 0.19          |
| DS Length (ms)                        | 19.04              | 18.8               | 3704734       | 3.3      | 0.069         |
| DS Amplitude ( $\mu$ V)               | 2611.7             | 2704.53            | 3704734       | 0.23     | 0.63          |
| Run Features                          | F mean<br>(n = 15) | M mean<br>(n = 15) | df            | F        | p             |
| CA1 MUA (Hz)                          | 93.65              | 121.75             | 304843        | 0.19     | 0.67          |
| CA3 MUA (Hz)                          | 316.81             | 263.00             | 304843        | 4.36     | 0.04          |
| DG MUA (Hz)                           | 329.59             | 296.09             | 304803        | 4.32     | 0.04          |
| CA1 SG Power ( $\mu$ V <sup>2</sup> ) | 485.49             | 482.7              | 66893         | 0.016    | 0.9           |
| CA1–CA3 SG Coh.                       | 0.61               | 0.61               | 250460        | 0        | 0.99          |
| CA1–DG SG Coh.                        | 0.58               | 0.57               | 244915        | 0.2      | 0.65          |
| CA1 SG Freq. (Hz)                     | 40.48              | 40.76              | 2465138       | 0.33     | 0.56          |
| CA1 Theta–SG Comod.                   | 0                  | 0.01               | 66893         | 2.2      | 0.14          |
| CA1 FG Power ( $\mu$ V <sup>2</sup> ) | 74.66              | 72.33              | 66893         | 0.36     | 0.55          |
| CA1 SG/FG ratio                       | 6.17               | 6.37               | 66893         | 0.35     | 0.55          |
| CA1–CA3 FG Coh.                       | 0.56               | 0.56               | 242401        | 0.0066   | 0.94          |
| CA1–DG FG Coh.                        | 0.53               | 0.53               | 246436        | 0.026    | 0.87          |

|                               |         |         |         |        |       |
|-------------------------------|---------|---------|---------|--------|-------|
| CA1 FG Freq. (Hz)             | 79.12   | 78.93   | 4907656 | 0.0021 | 0.96  |
| CA1 Theta-FG Comod.           | 0.01    | 0.01    | 66893   | 1.3    | 0.25  |
| CA3 SG Power ( $\mu V^2$ )    | 133.15  | 135.51  | 77230   | 0.0069 | 0.93  |
| DG SG Power ( $\mu V^2$ )     | 367.43  | 336.19  | 80834   | 1.1    | 0.3   |
| CA3 SG Freq. (Hz)             | 41.03   | 41.11   | 2806688 | 0.034  | 0.85  |
| DG SG Freq. (Hz)              | 41.49   | 41.81   | 2717918 | 0.49   | 0.48  |
| CA3 Theta-SG Comod.           | 0.01    | 0.01    | 77230   | 0.22   | 0.64  |
| DG Theta-SG Comod.            | 0.01    | 0.01    | 80834   | 0.62   | 0.43  |
| CA3 FG Power ( $\mu V^2$ )    | 25.11   | 23.56   | 77230   | 0.026  | 0.87  |
| DG FG Power ( $\mu V^2$ )     | 85.72   | 75.36   | 80834   | 0.4    | 0.53  |
| CA3 SG/FG ratio               | 5.53    | 5.27    | 77230   | 0.12   | 0.73  |
| DG SG/FG ratio                | 4.7     | 4.27    | 80834   | 0.64   | 0.42  |
| CA3 FG Freq. (Hz)             | 81.24   | 80.63   | 5598054 | 0.27   | 0.6   |
| DG FG Freq. (Hz)              | 80.65   | 80.91   | 5337353 | 0.7    | 0.4   |
| CA3 Theta-FG Comod.           | 0.01    | 0.01    | 77230   | 1.3    | 0.26  |
| DG Theta-FG Comod.            | 0.01    | 0.01    | 80834   | 0.16   | 0.69  |
| CA1 Theta Power ( $\mu V^2$ ) | 795.65  | 885.27  | 66893   | 0.19   | 0.66  |
| CA3 Theta Power ( $\mu V^2$ ) | 1153.66 | 1005.65 | 77230   | 1.1    | 0.29  |
| DG Theta Power ( $\mu V^2$ )  | 2545.05 | 1940.38 | 80834   | 4.6    | 0.032 |
| CA1-CA3 Theta Coh.            | 0.79    | 0.81    | 246436  | 0.88   | 0.35  |
| CA1-DG Theta Coh.             | 0.78    | 0.77    | 280238  | 0.18   | 0.67  |
| CA1 Theta Freq. (Hz)          | 9.16    | 9.13    | 713763  | 0.0071 | 0.93  |
| CA3 Theta Freq. (Hz)          | 9.11    | 9.09    | 641545  | 0.12   | 0.73  |
| DG Theta Freq. (Hz)           | 9.16    | 9.27    | 611269  | 0.37   | 0.54  |

F test of the LMM for sex effects. Significant comparisons are bolded.
